# Supplementary material
Source: Research Square preprint supplement (doi:10.21203/rs.3.rs-8632196/v1)
Supplement: Supplementary file 1 [file 28a400b5384373ae223a132e.docx]

A


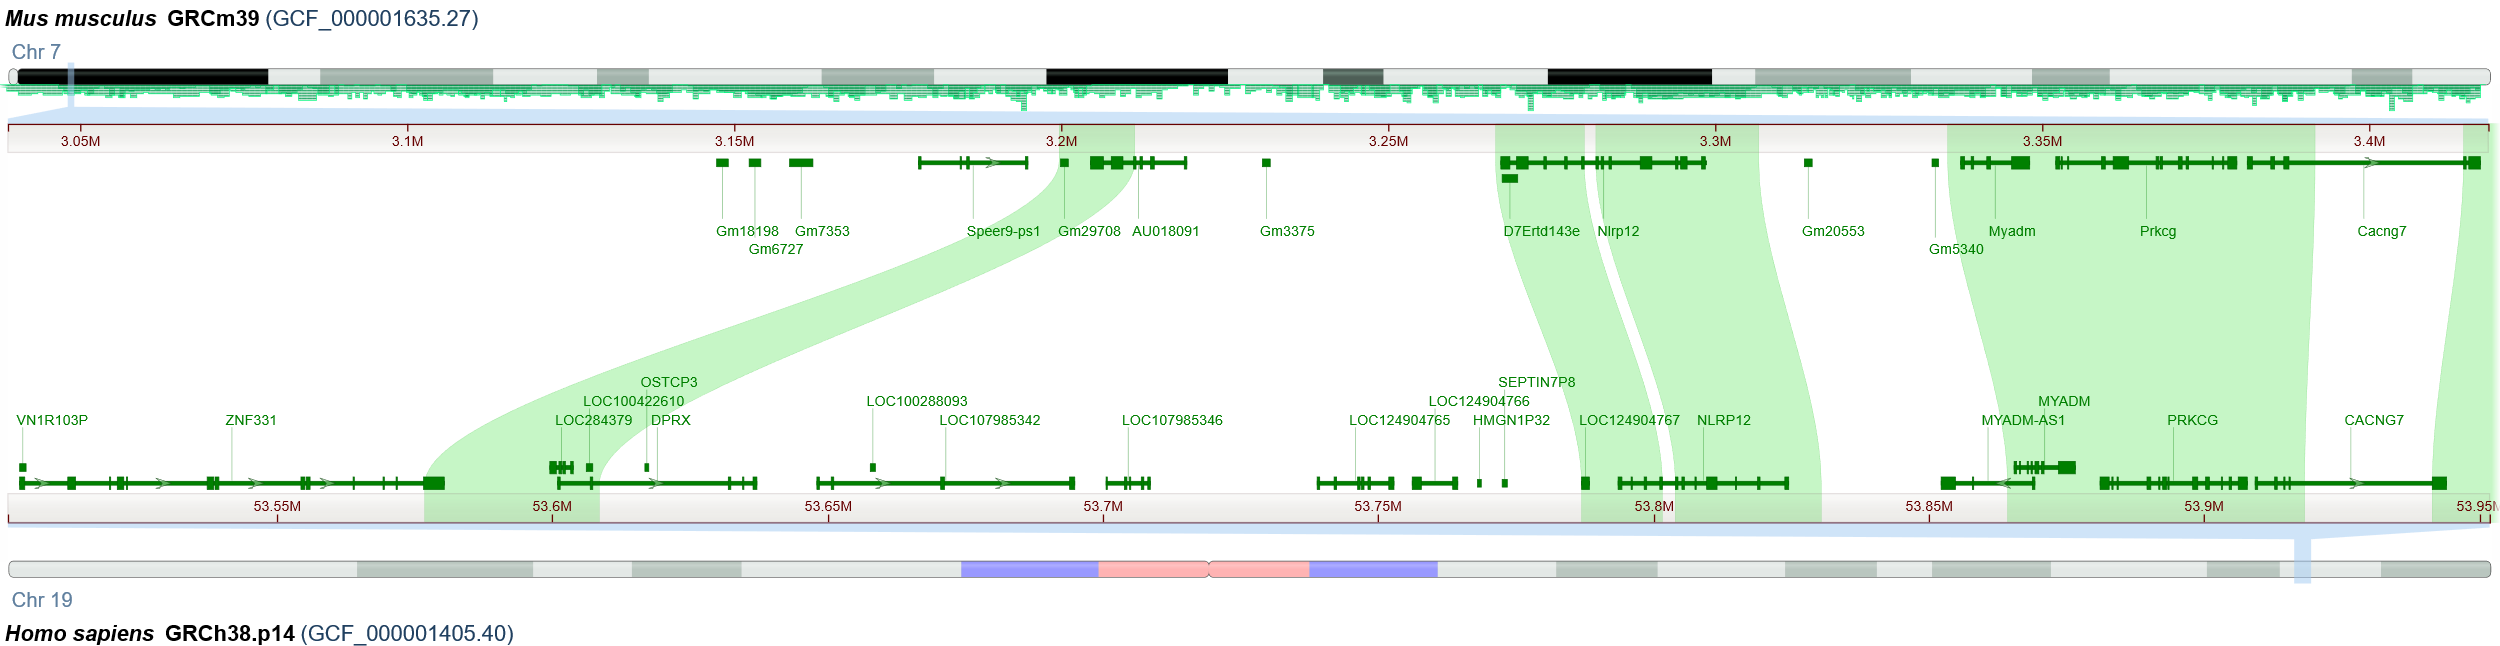


B
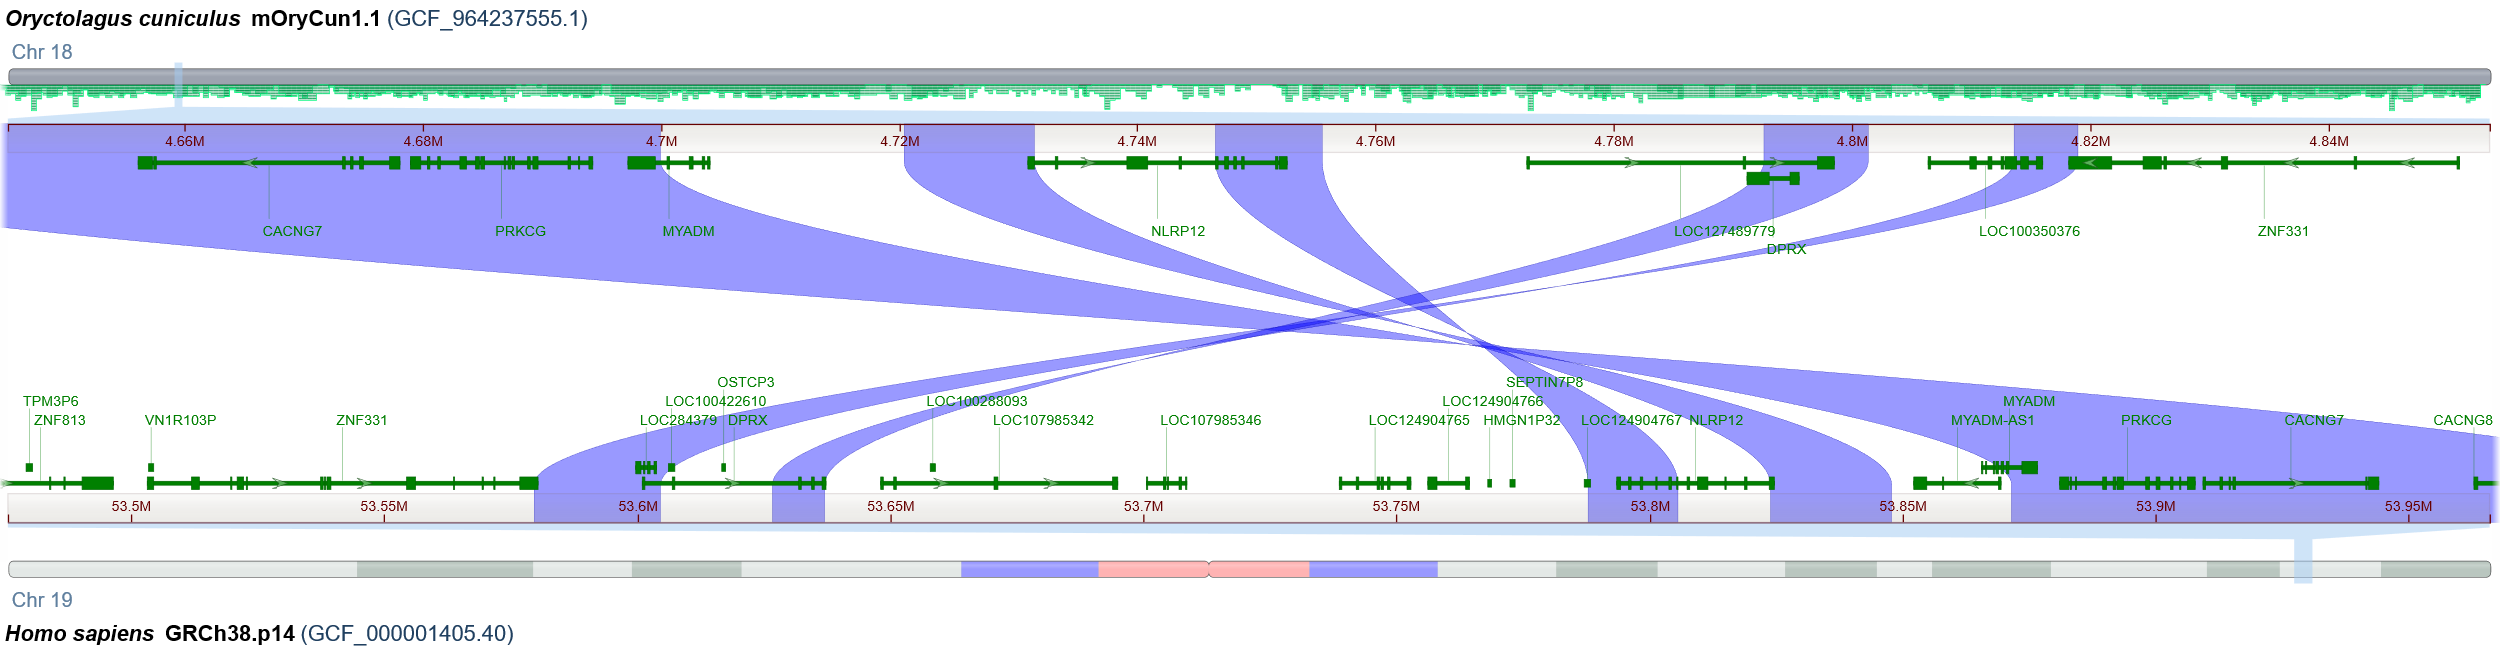
C
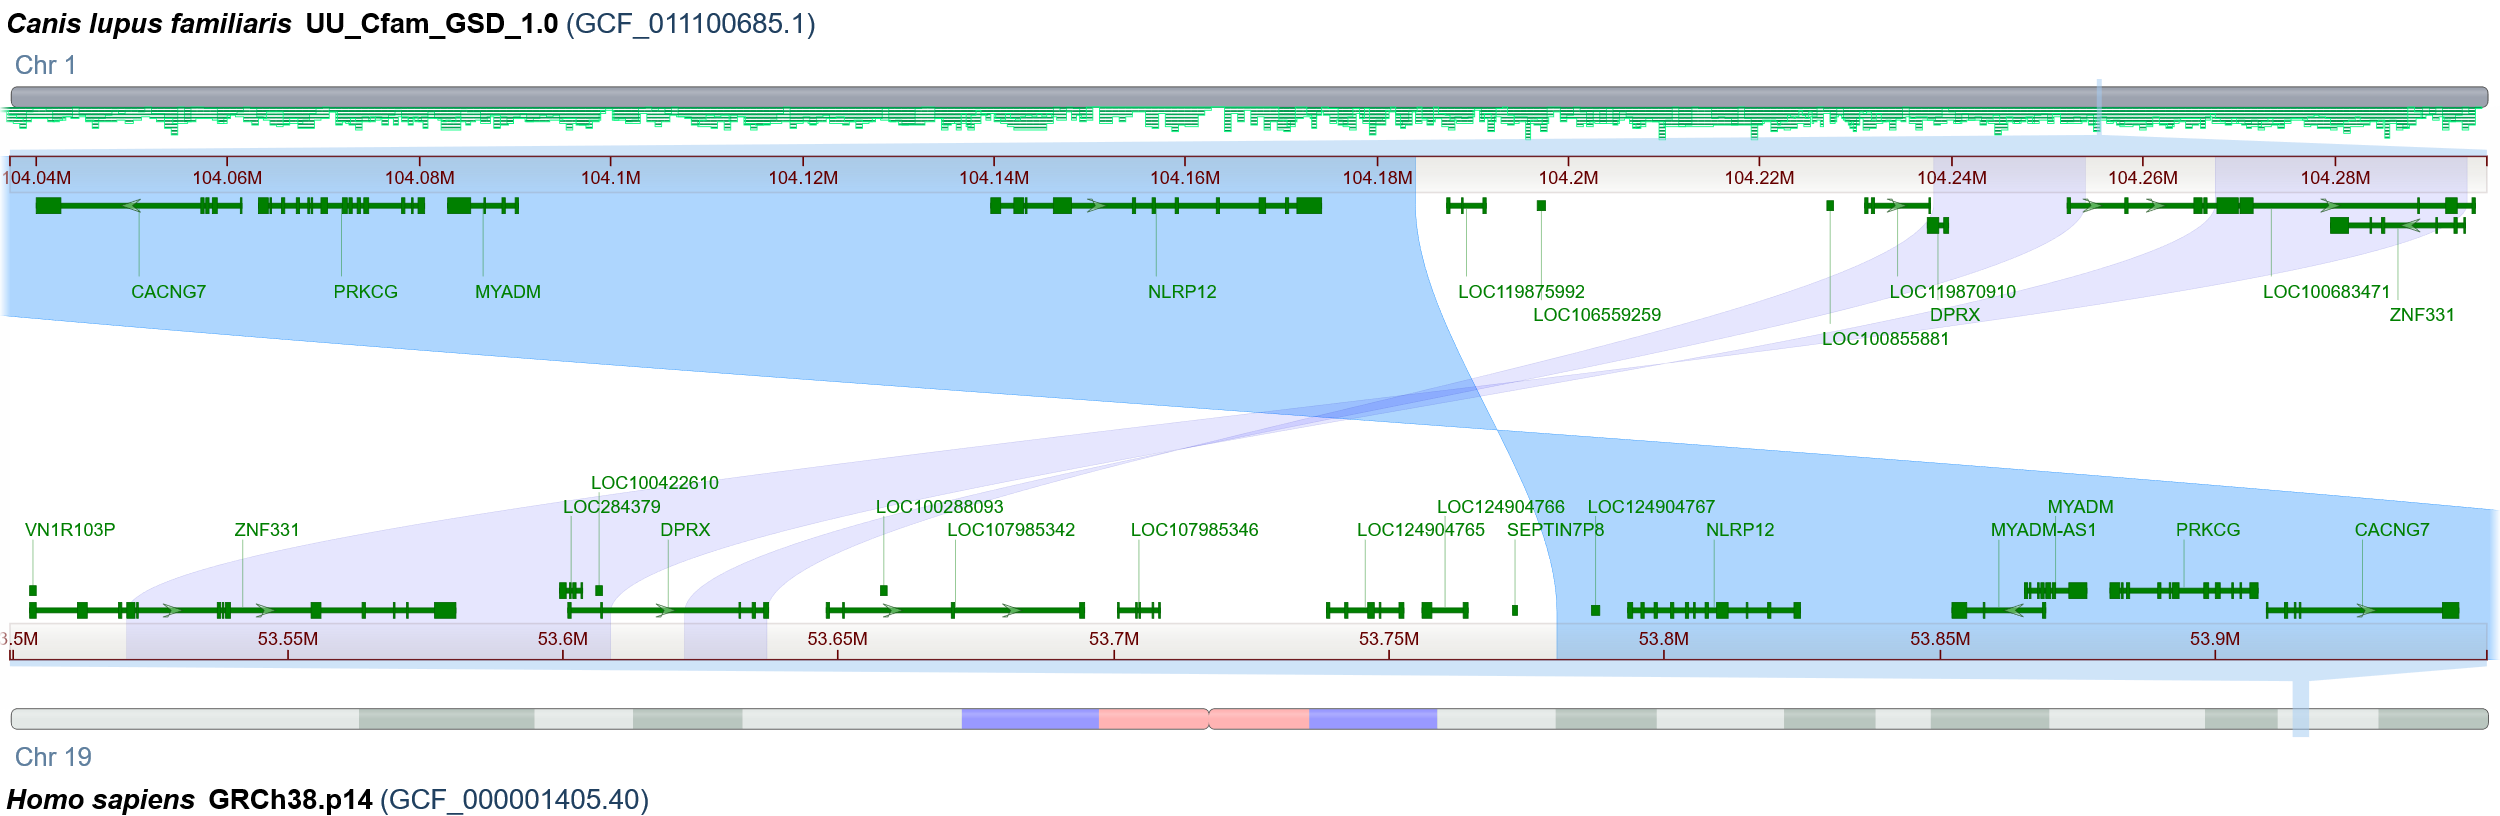
D
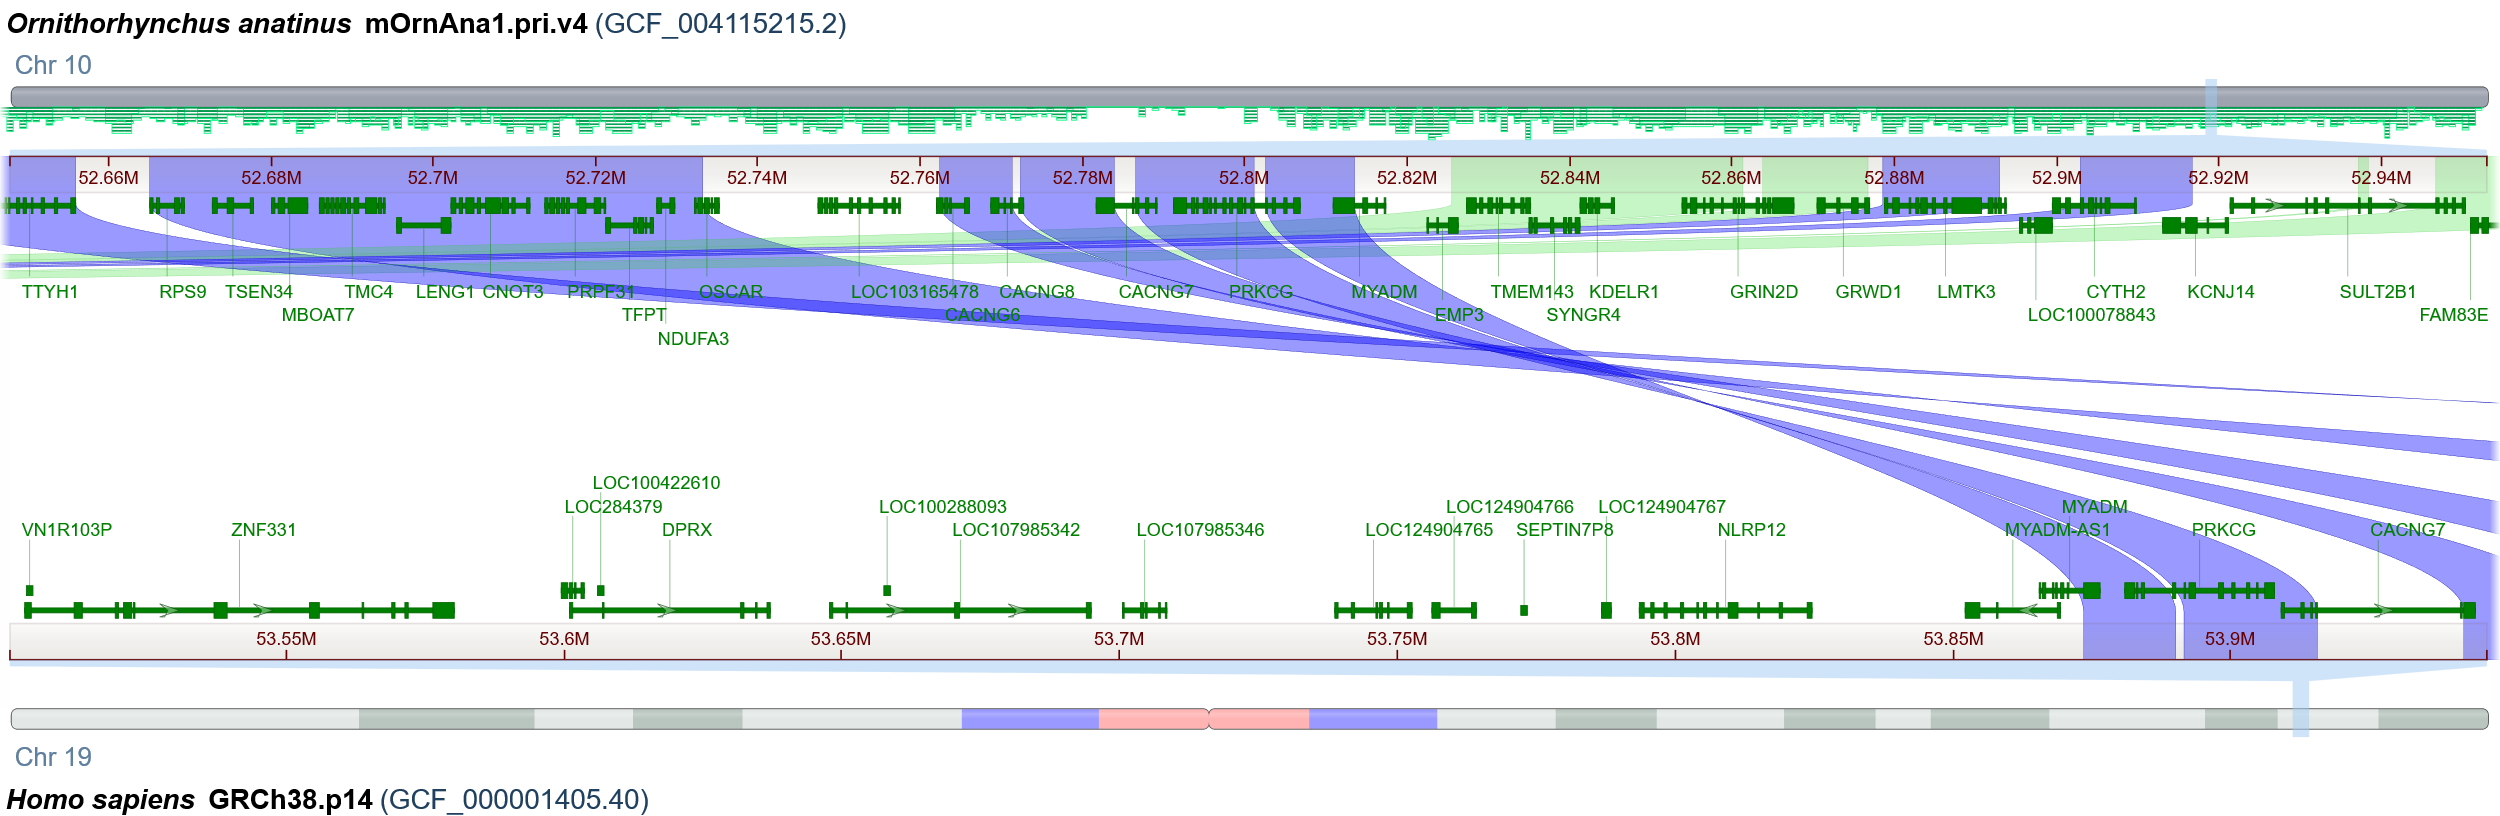
E
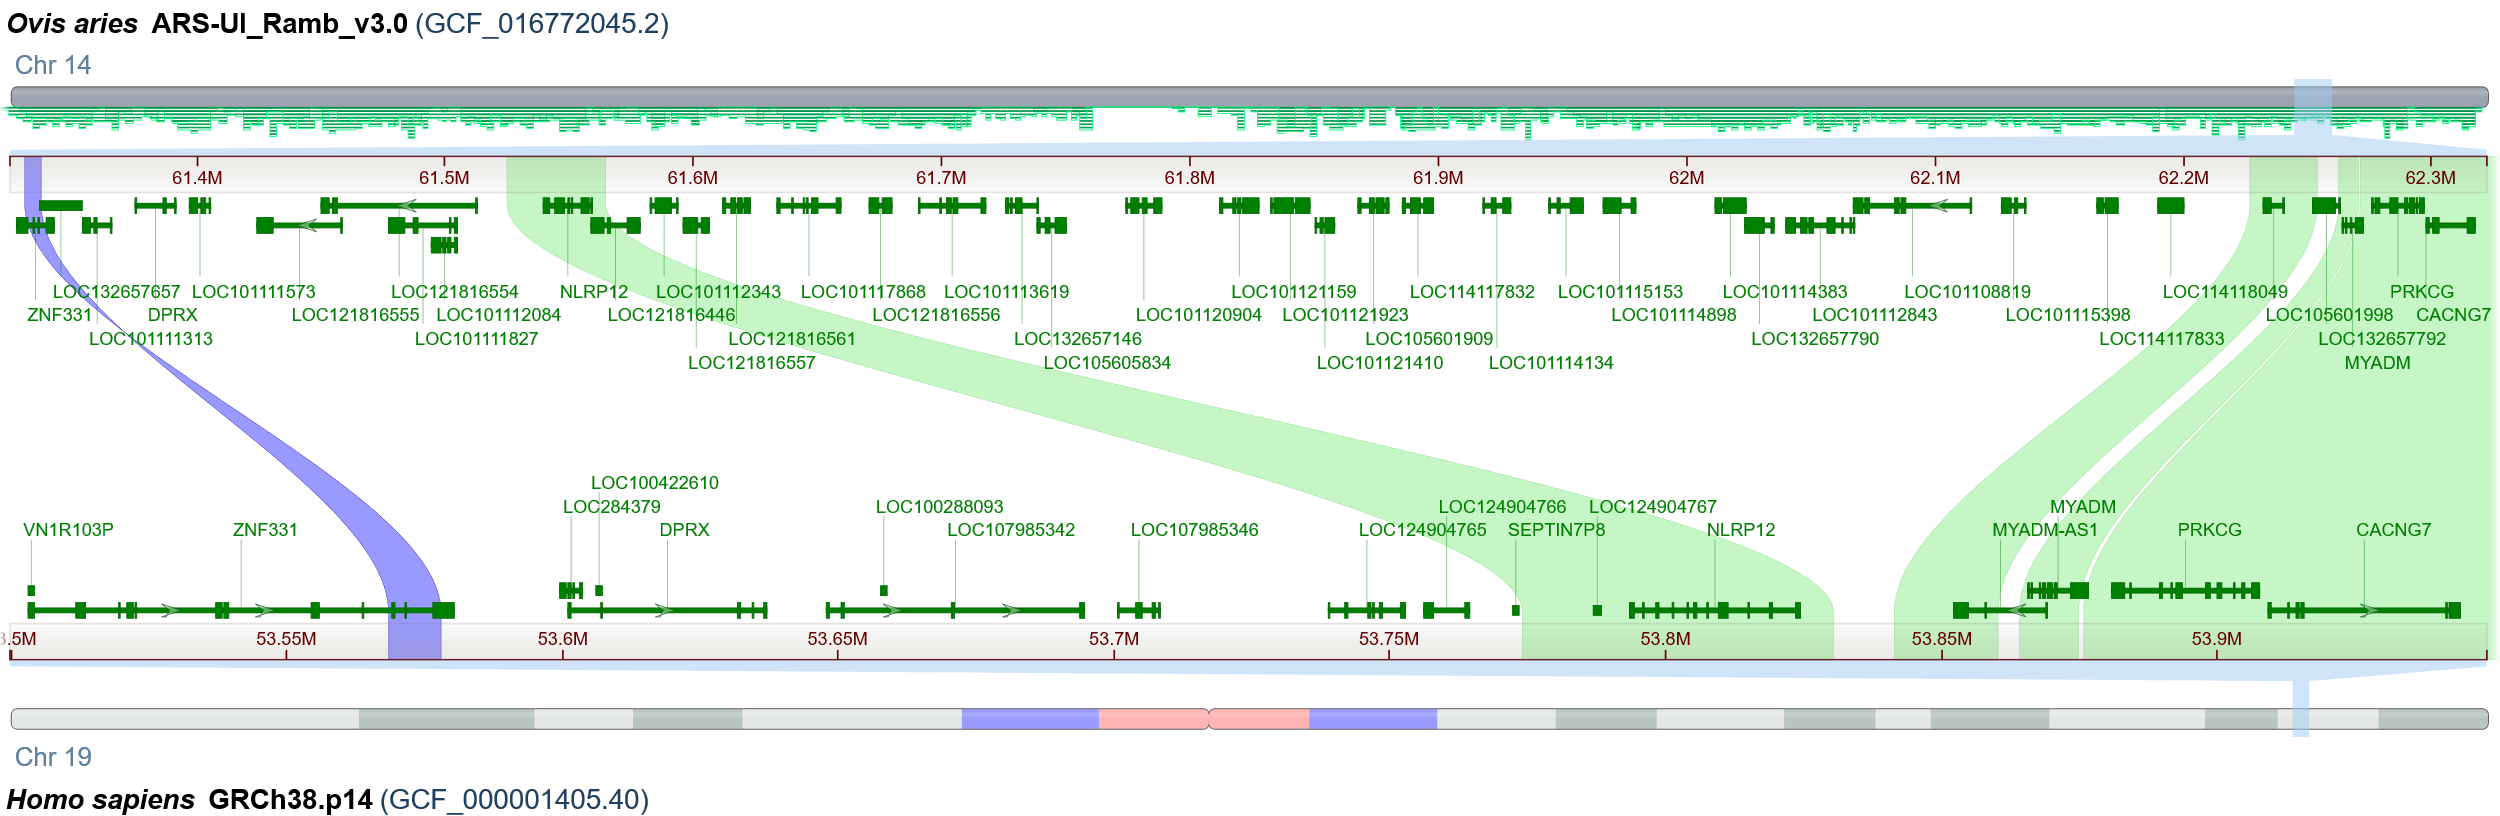
F
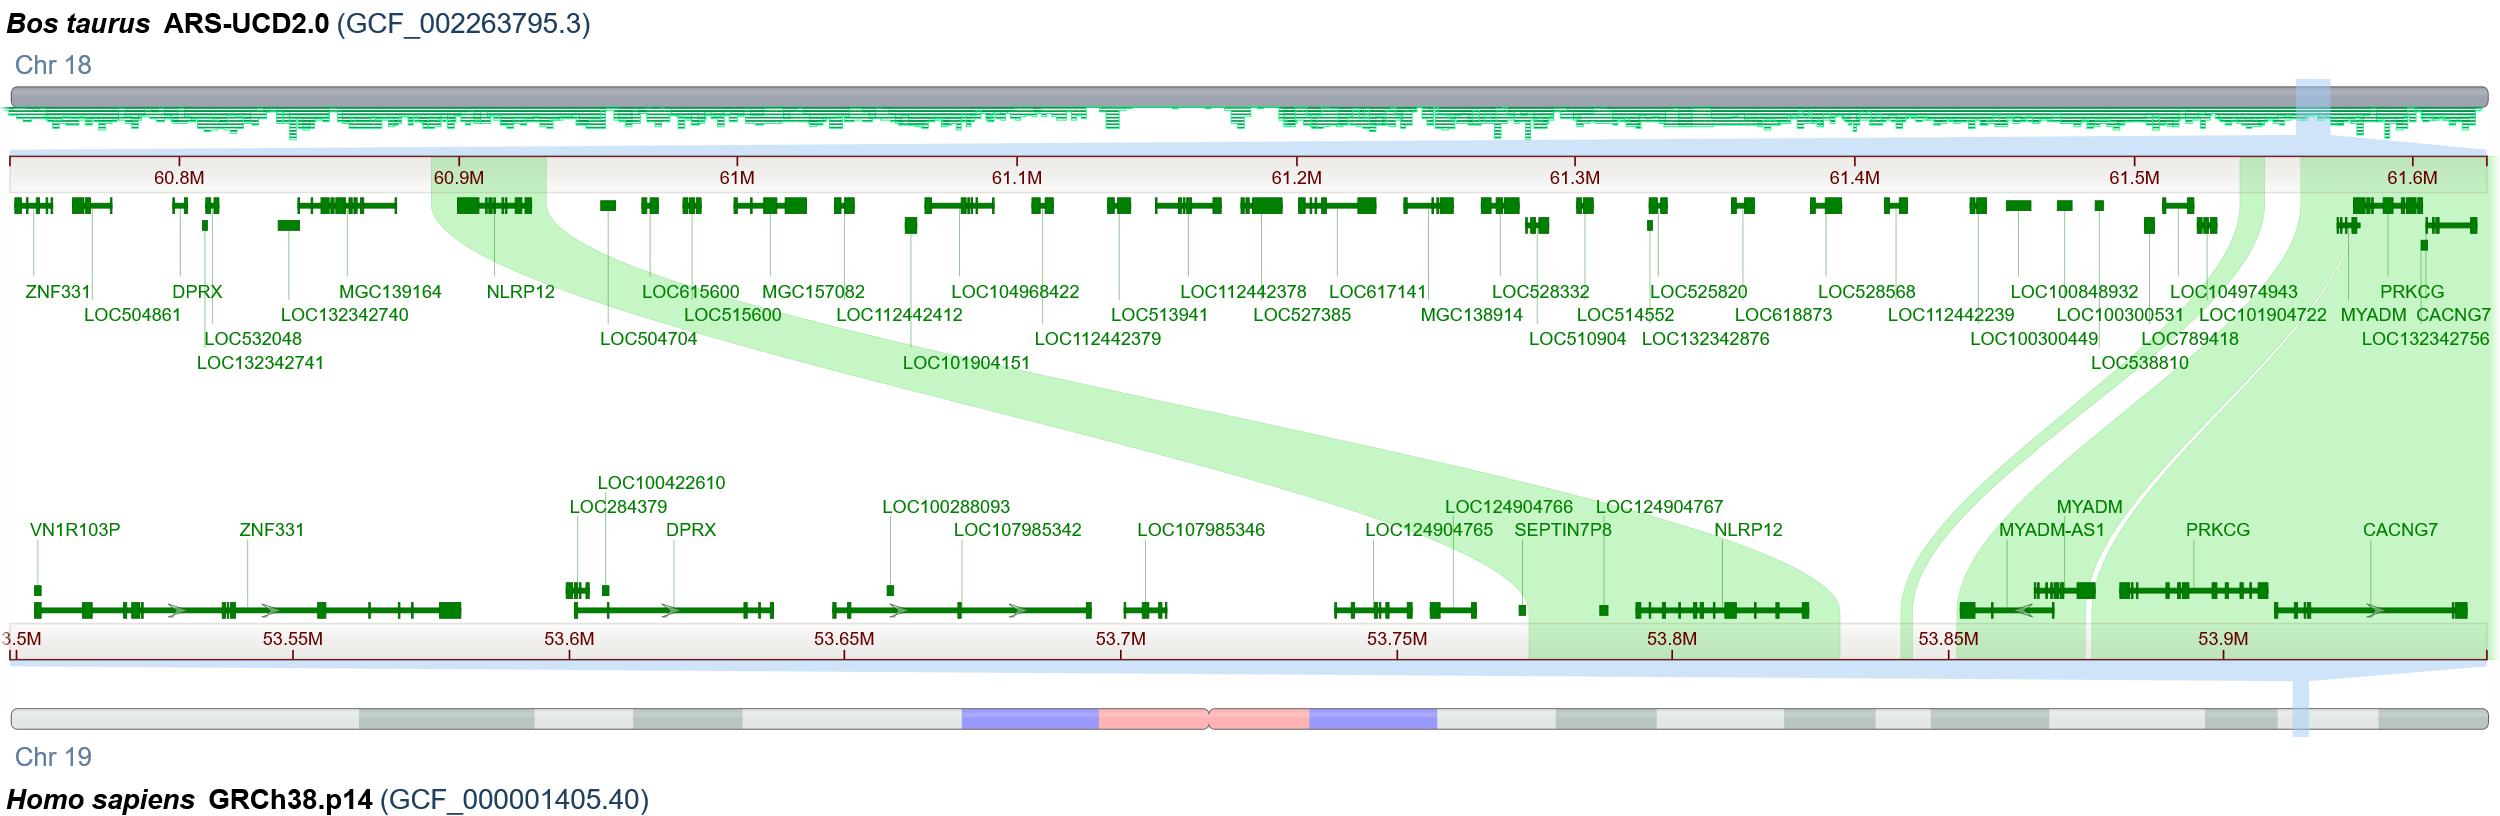
G
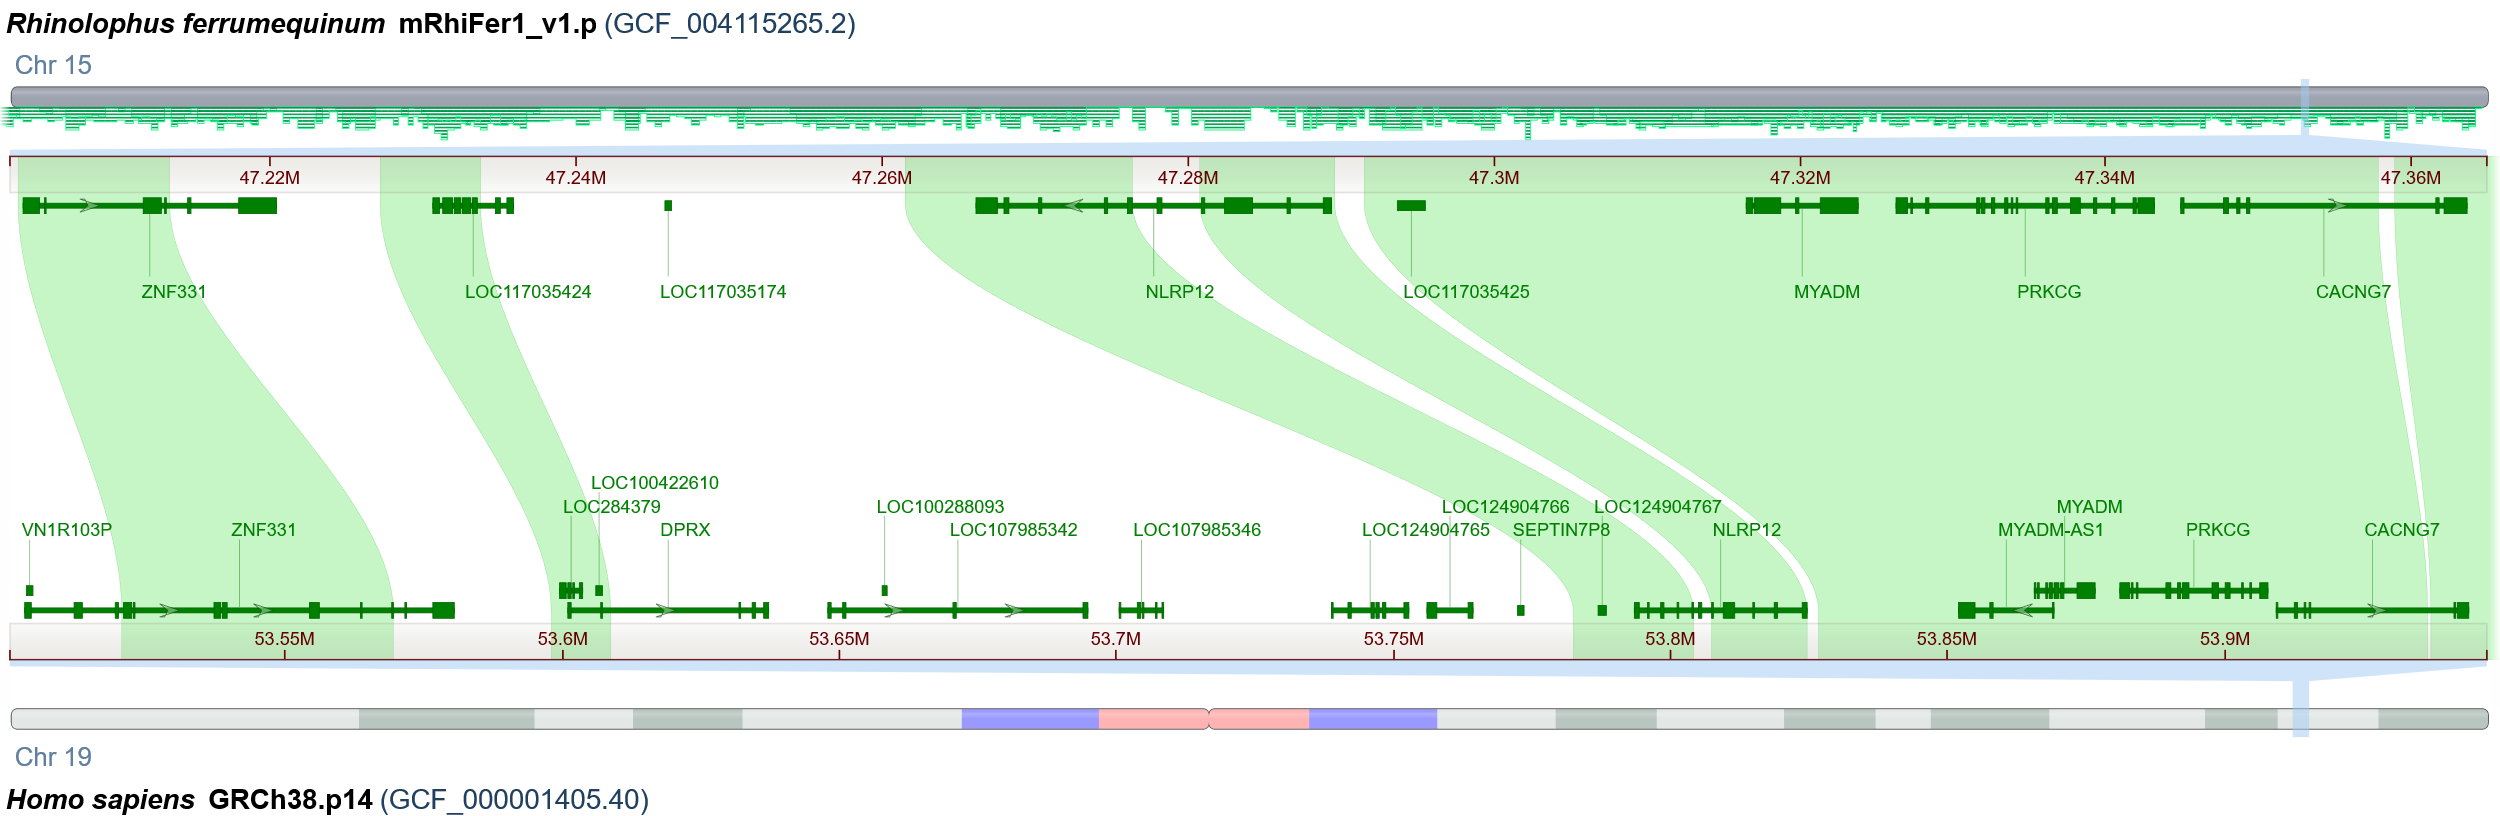
H
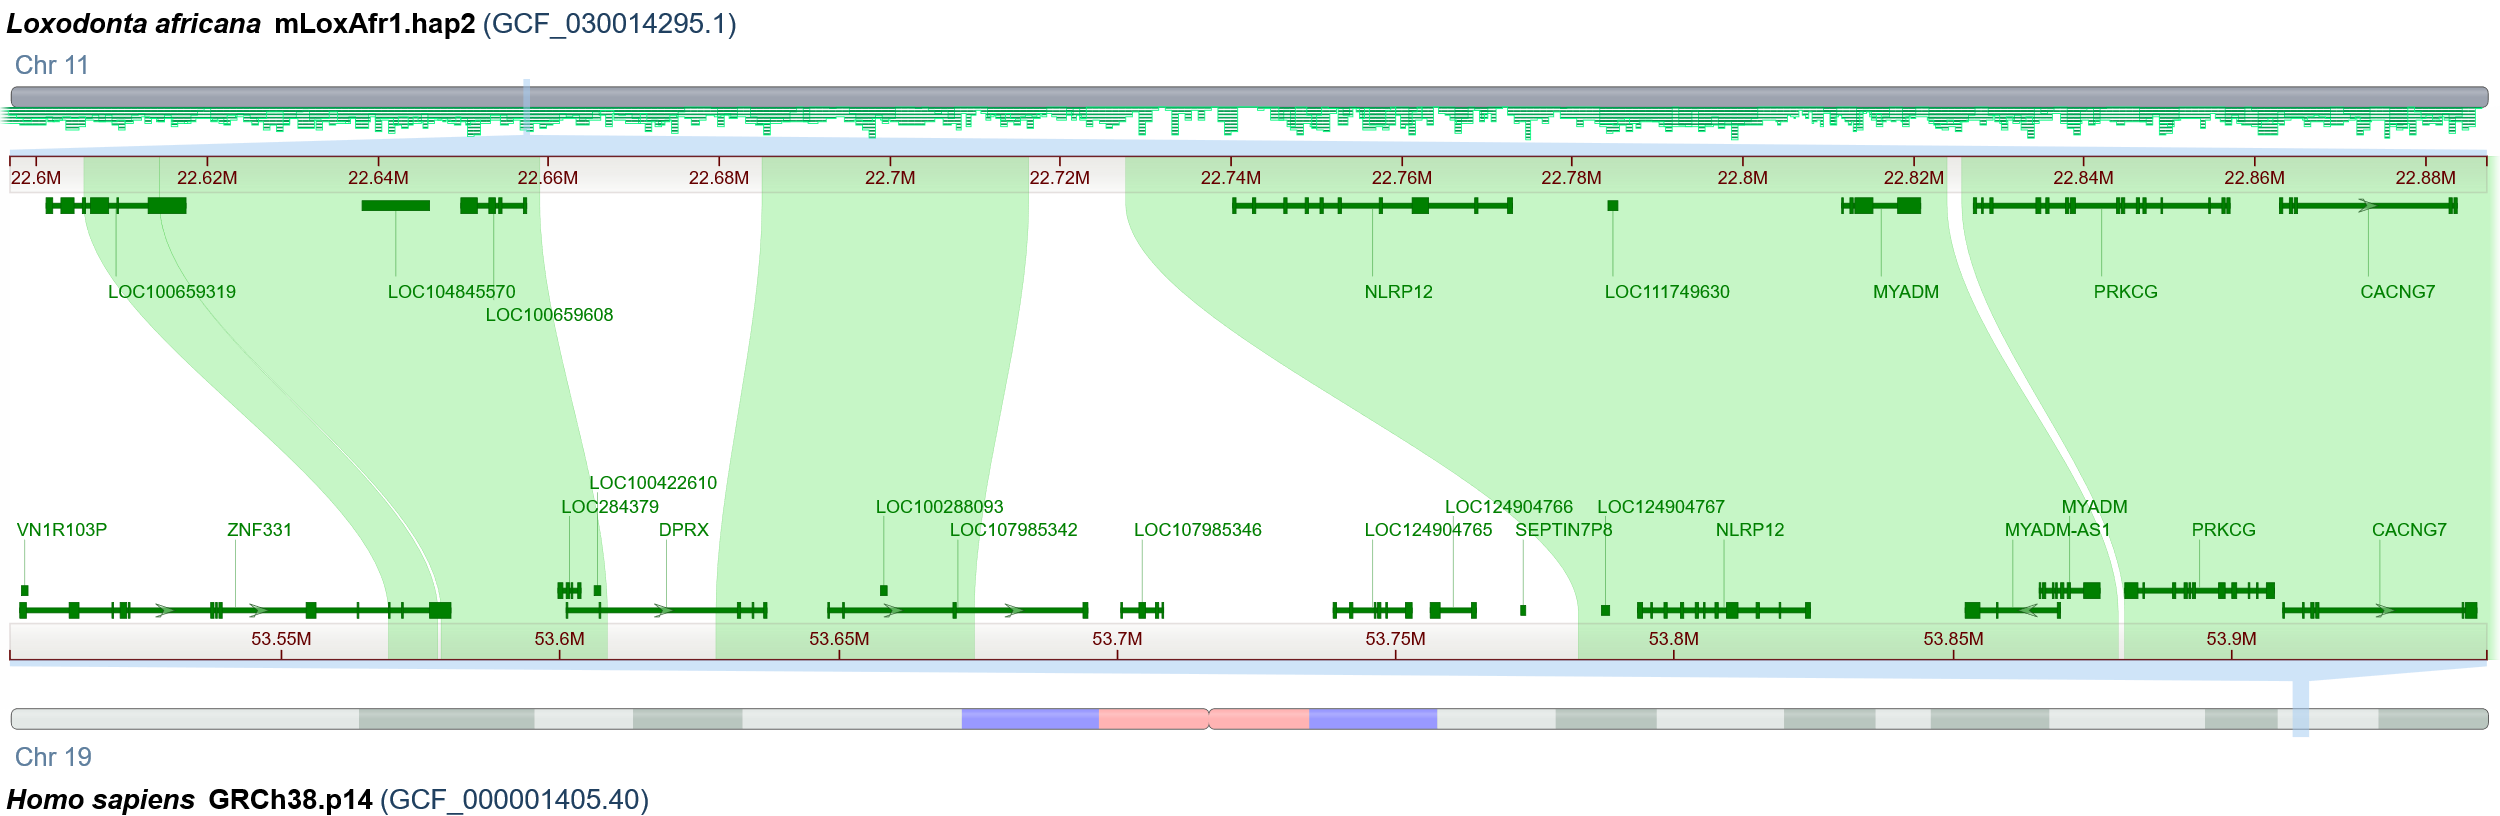


I


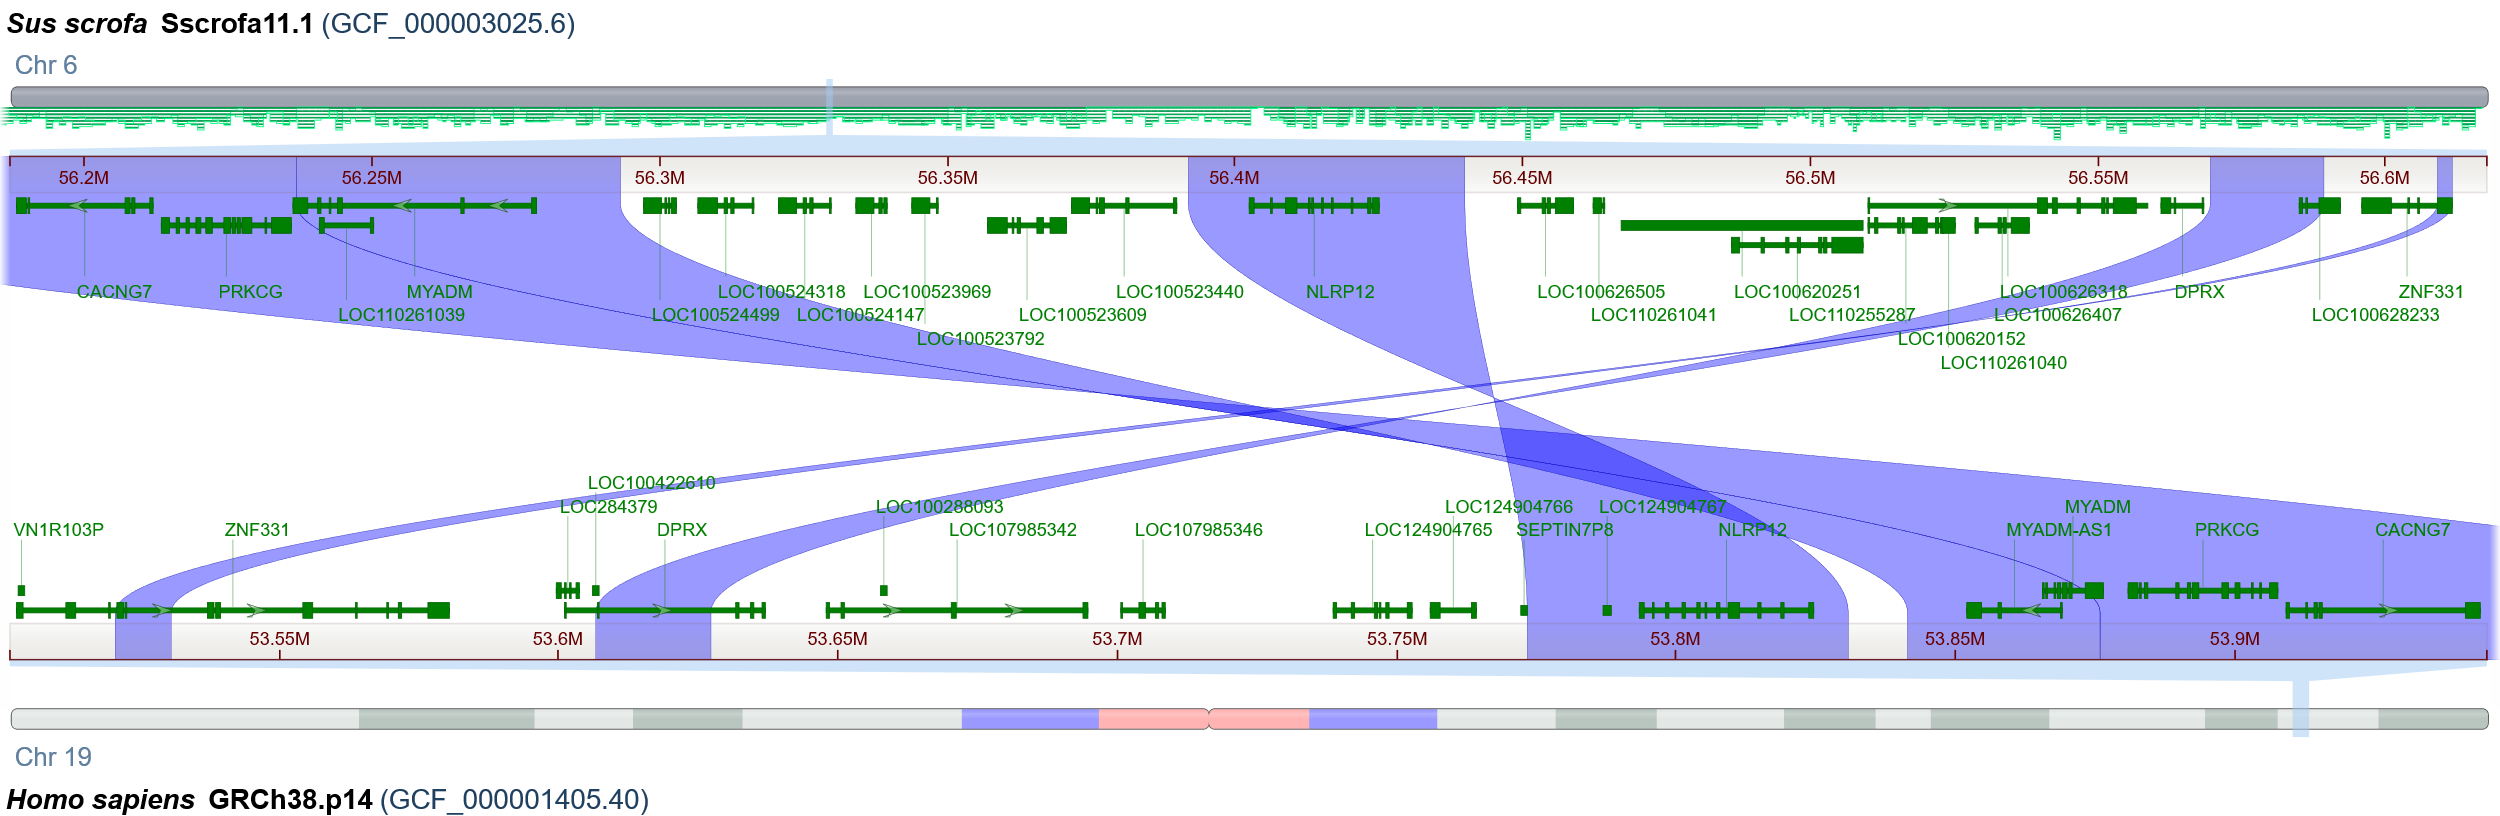


Fig S1 the region of *ZDNMPC* based on pair genome alignment between mammalians and human. A) human and mouse. B) human and rabbit. C) human and dog. D) human and platypus. E) human and sheep. F) human and cattle. G) human and bat. H) human and elephant. I) human and pig.

A
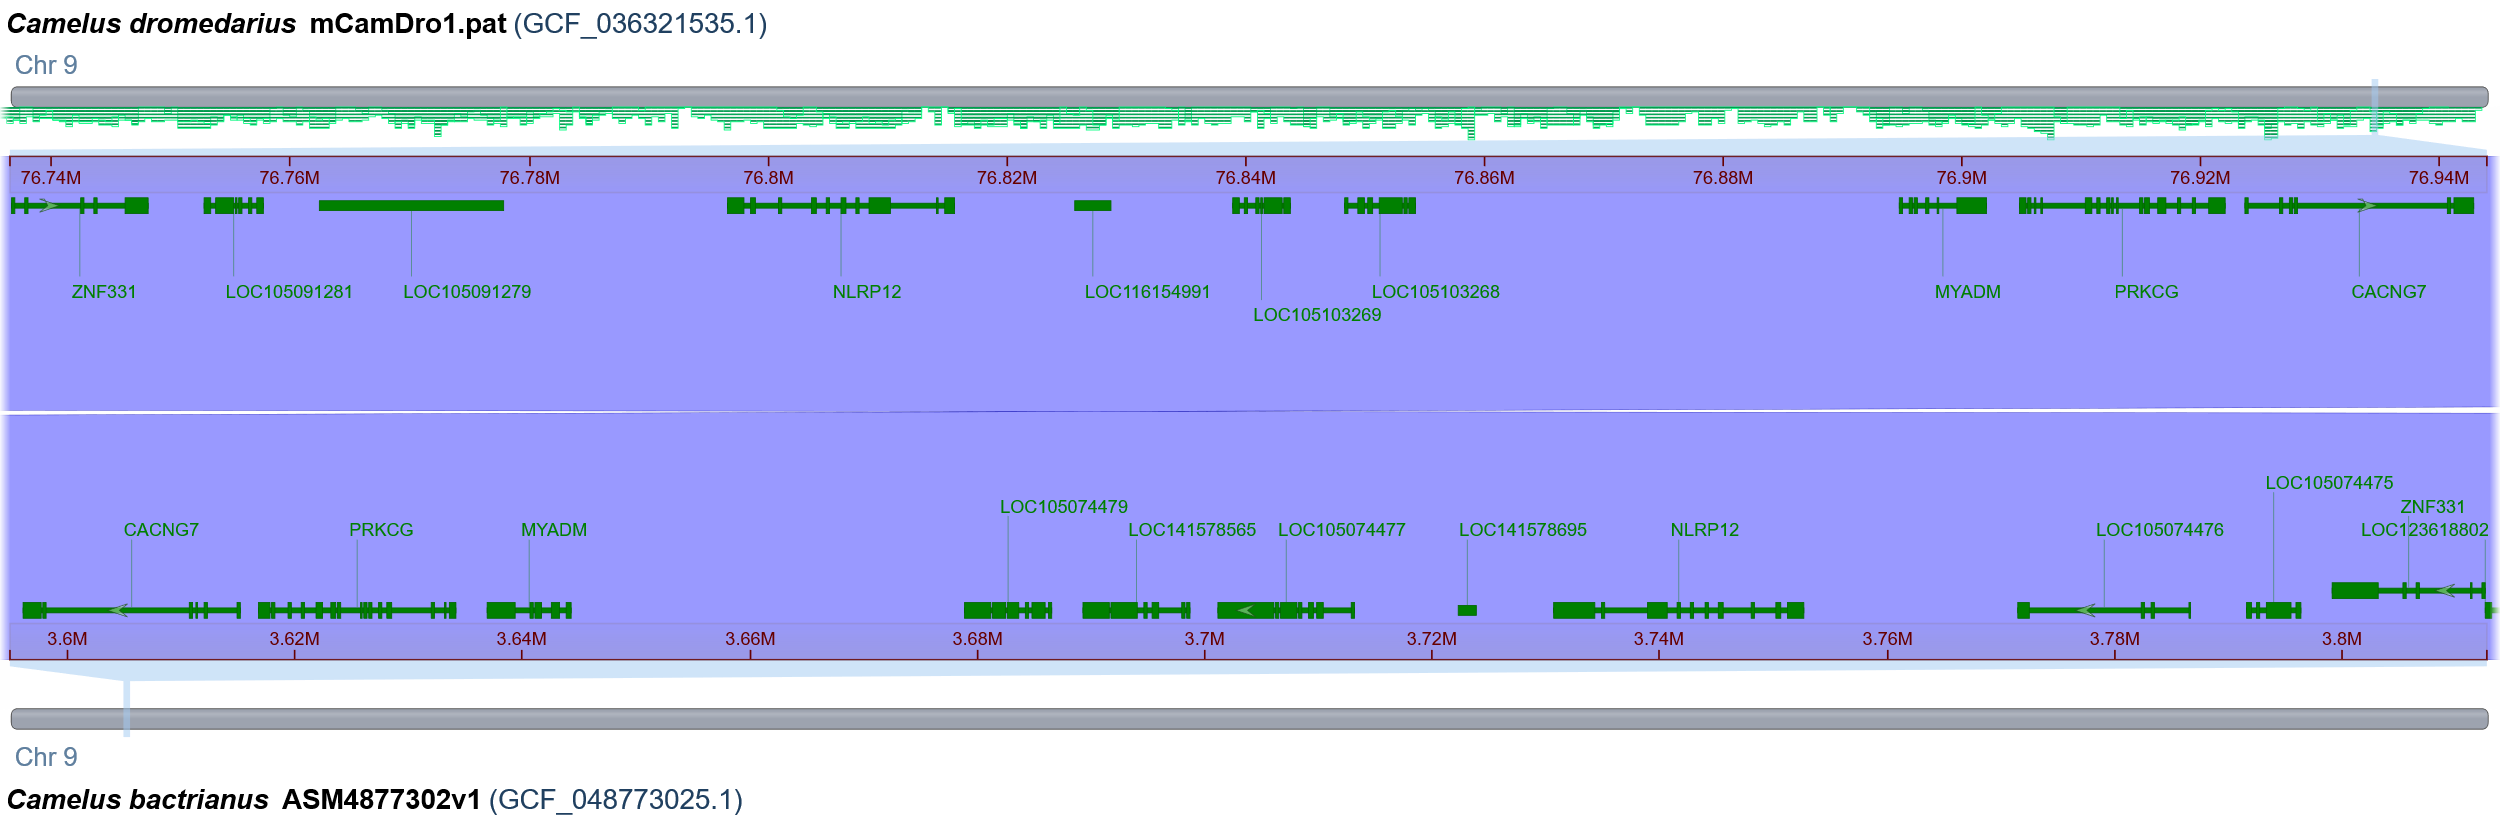
B
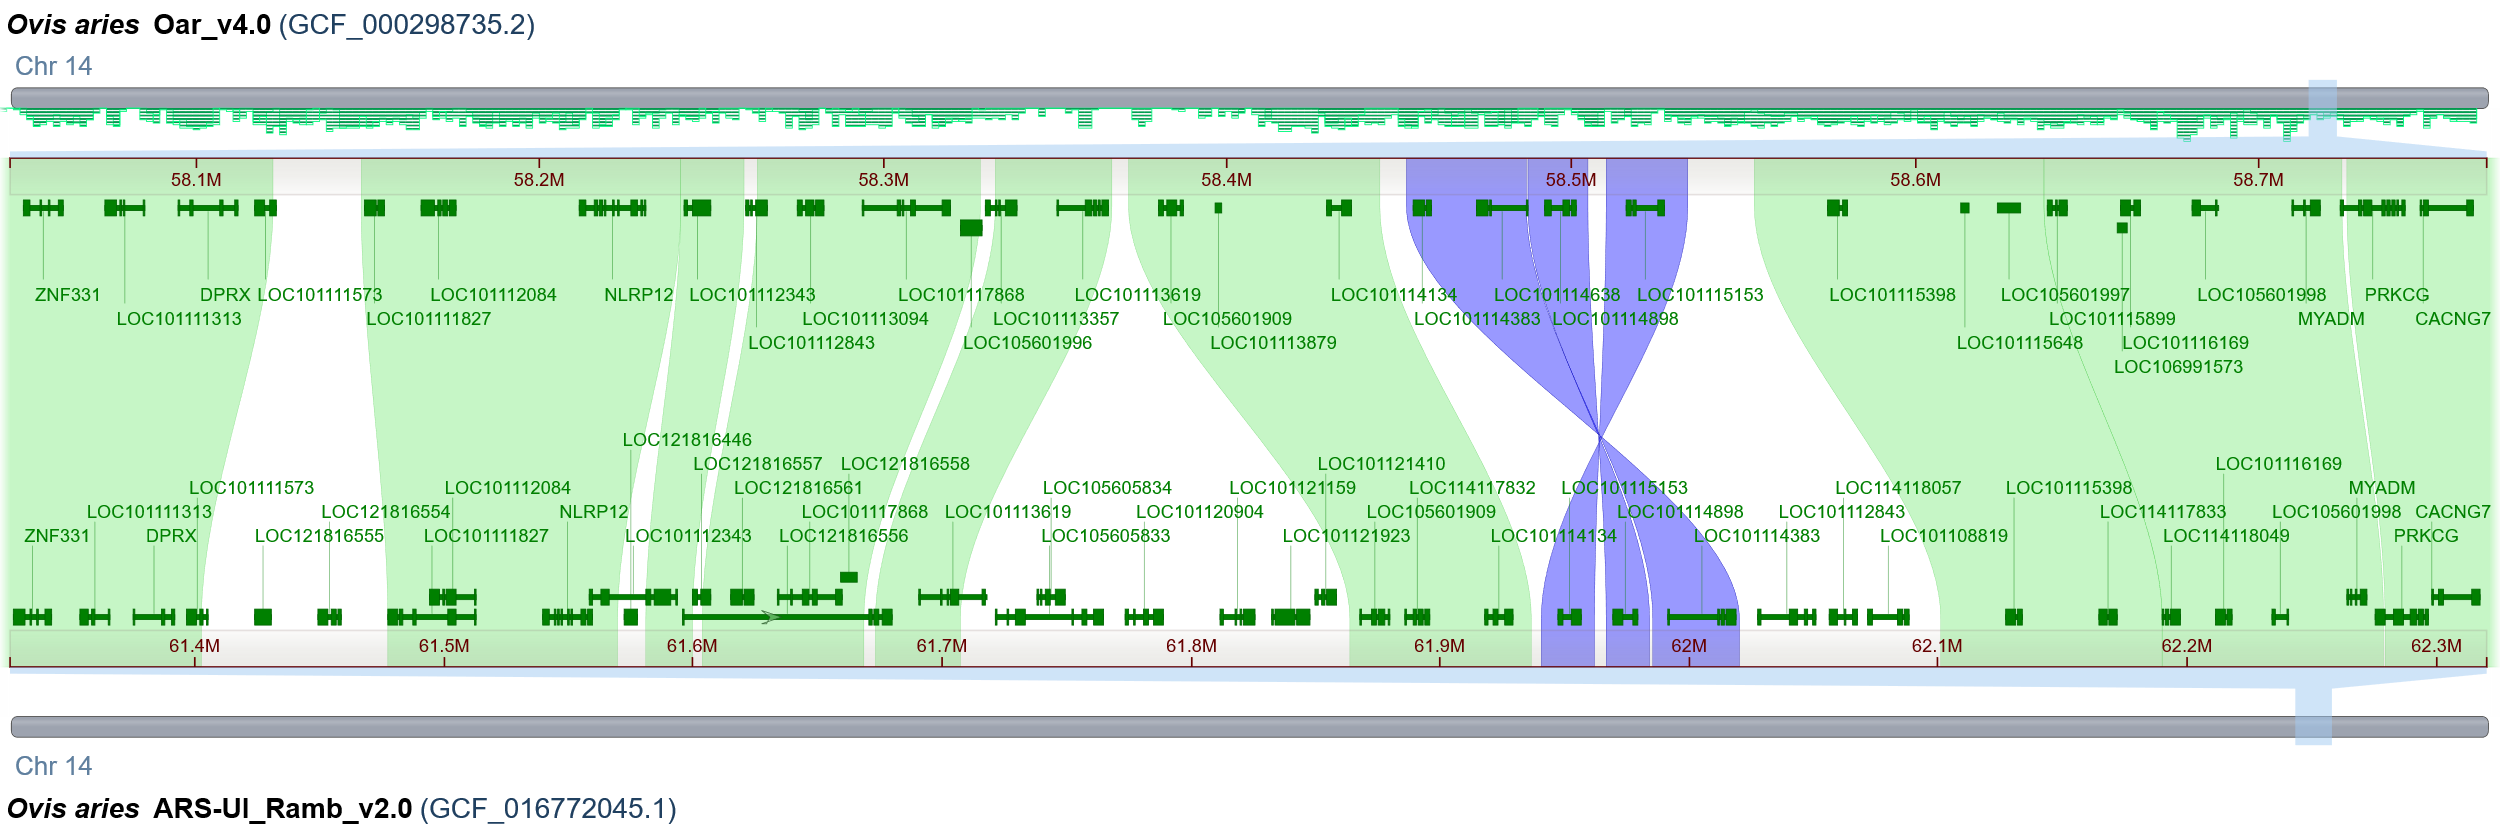
C
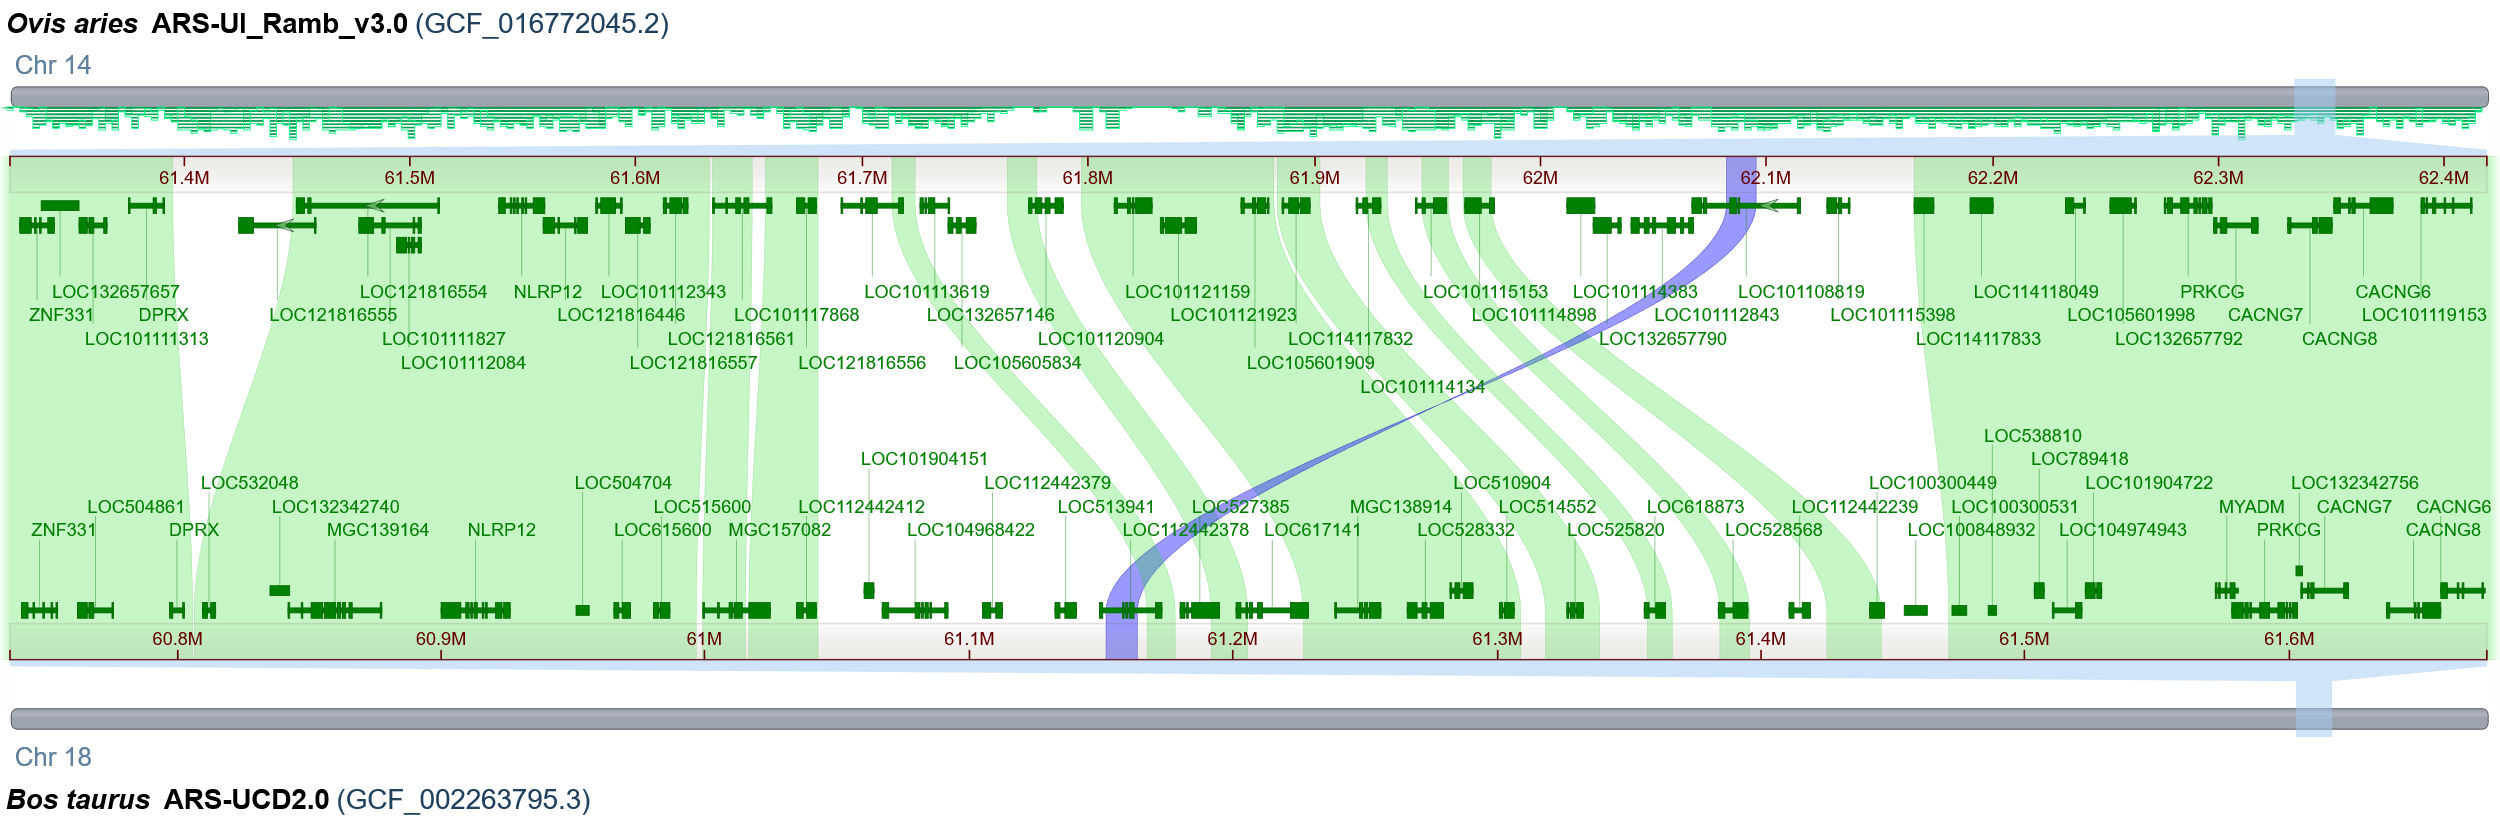
 D
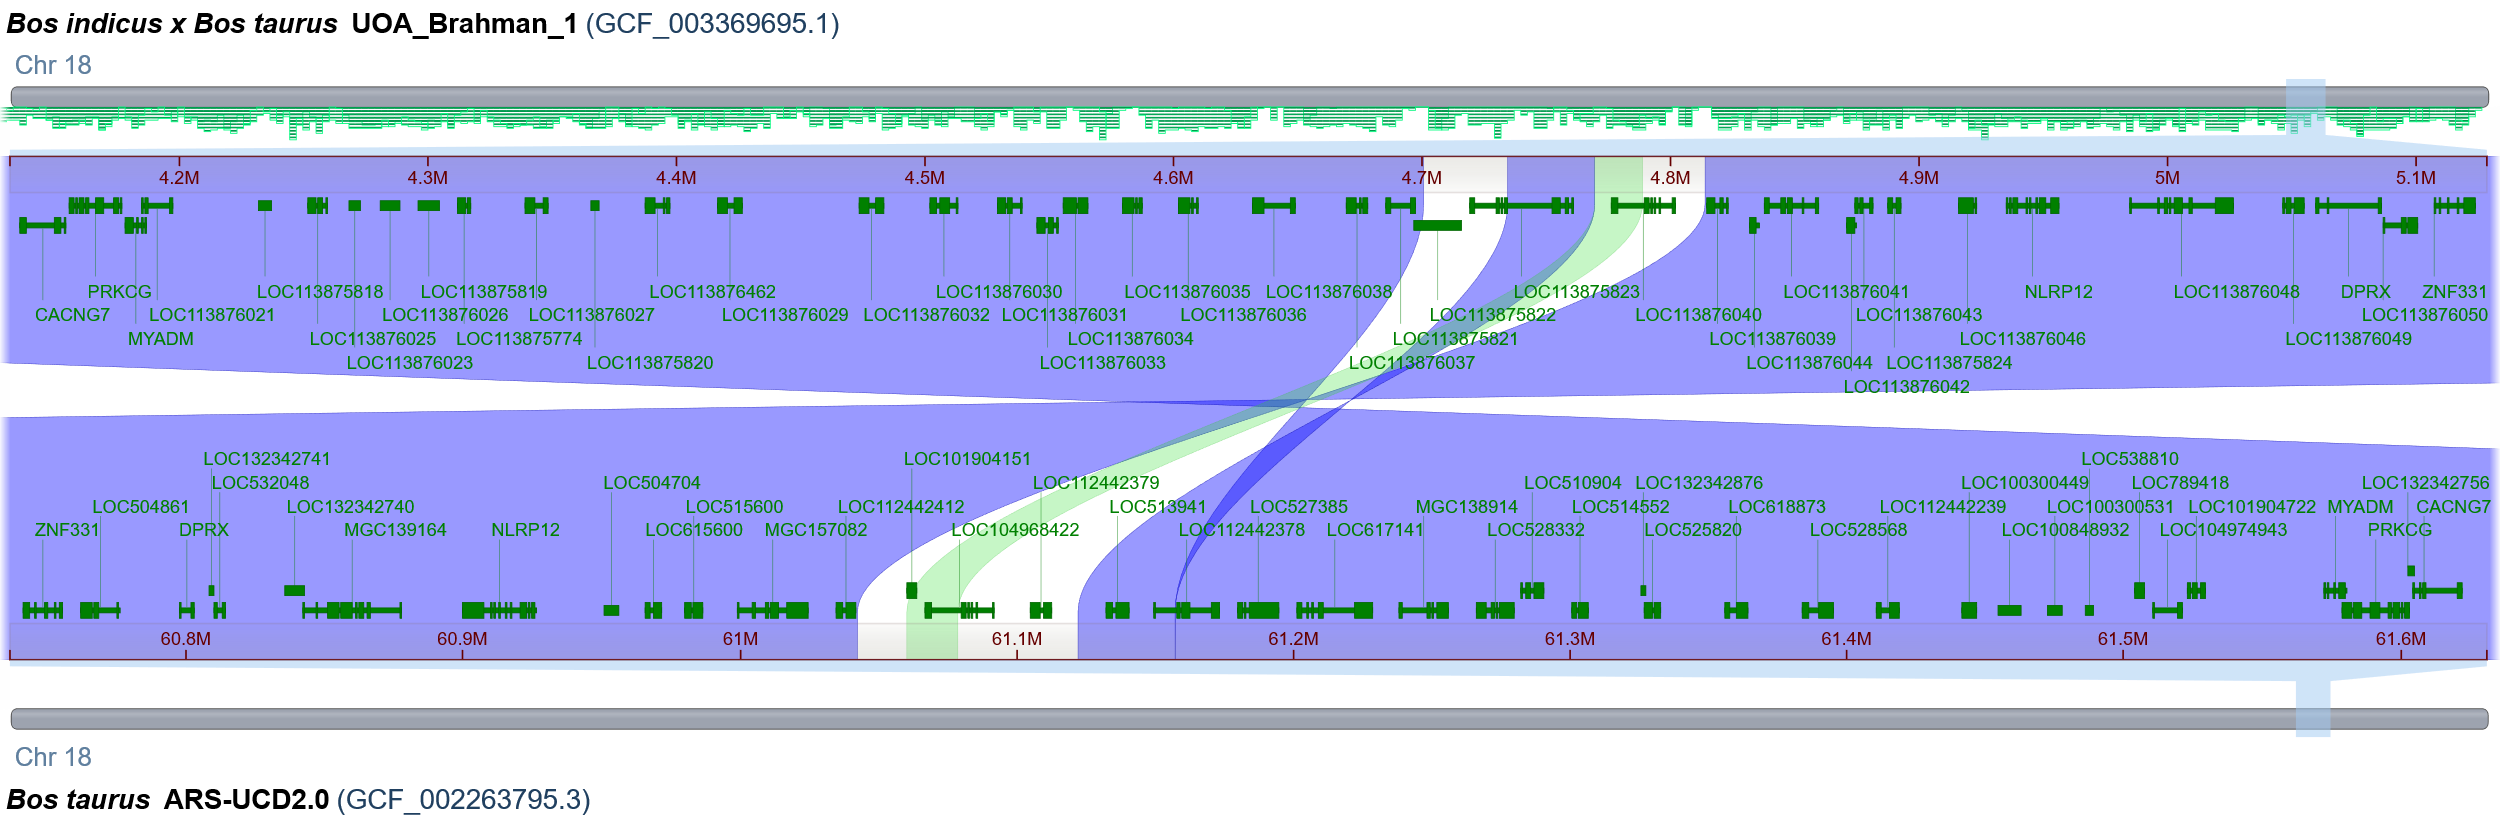
E
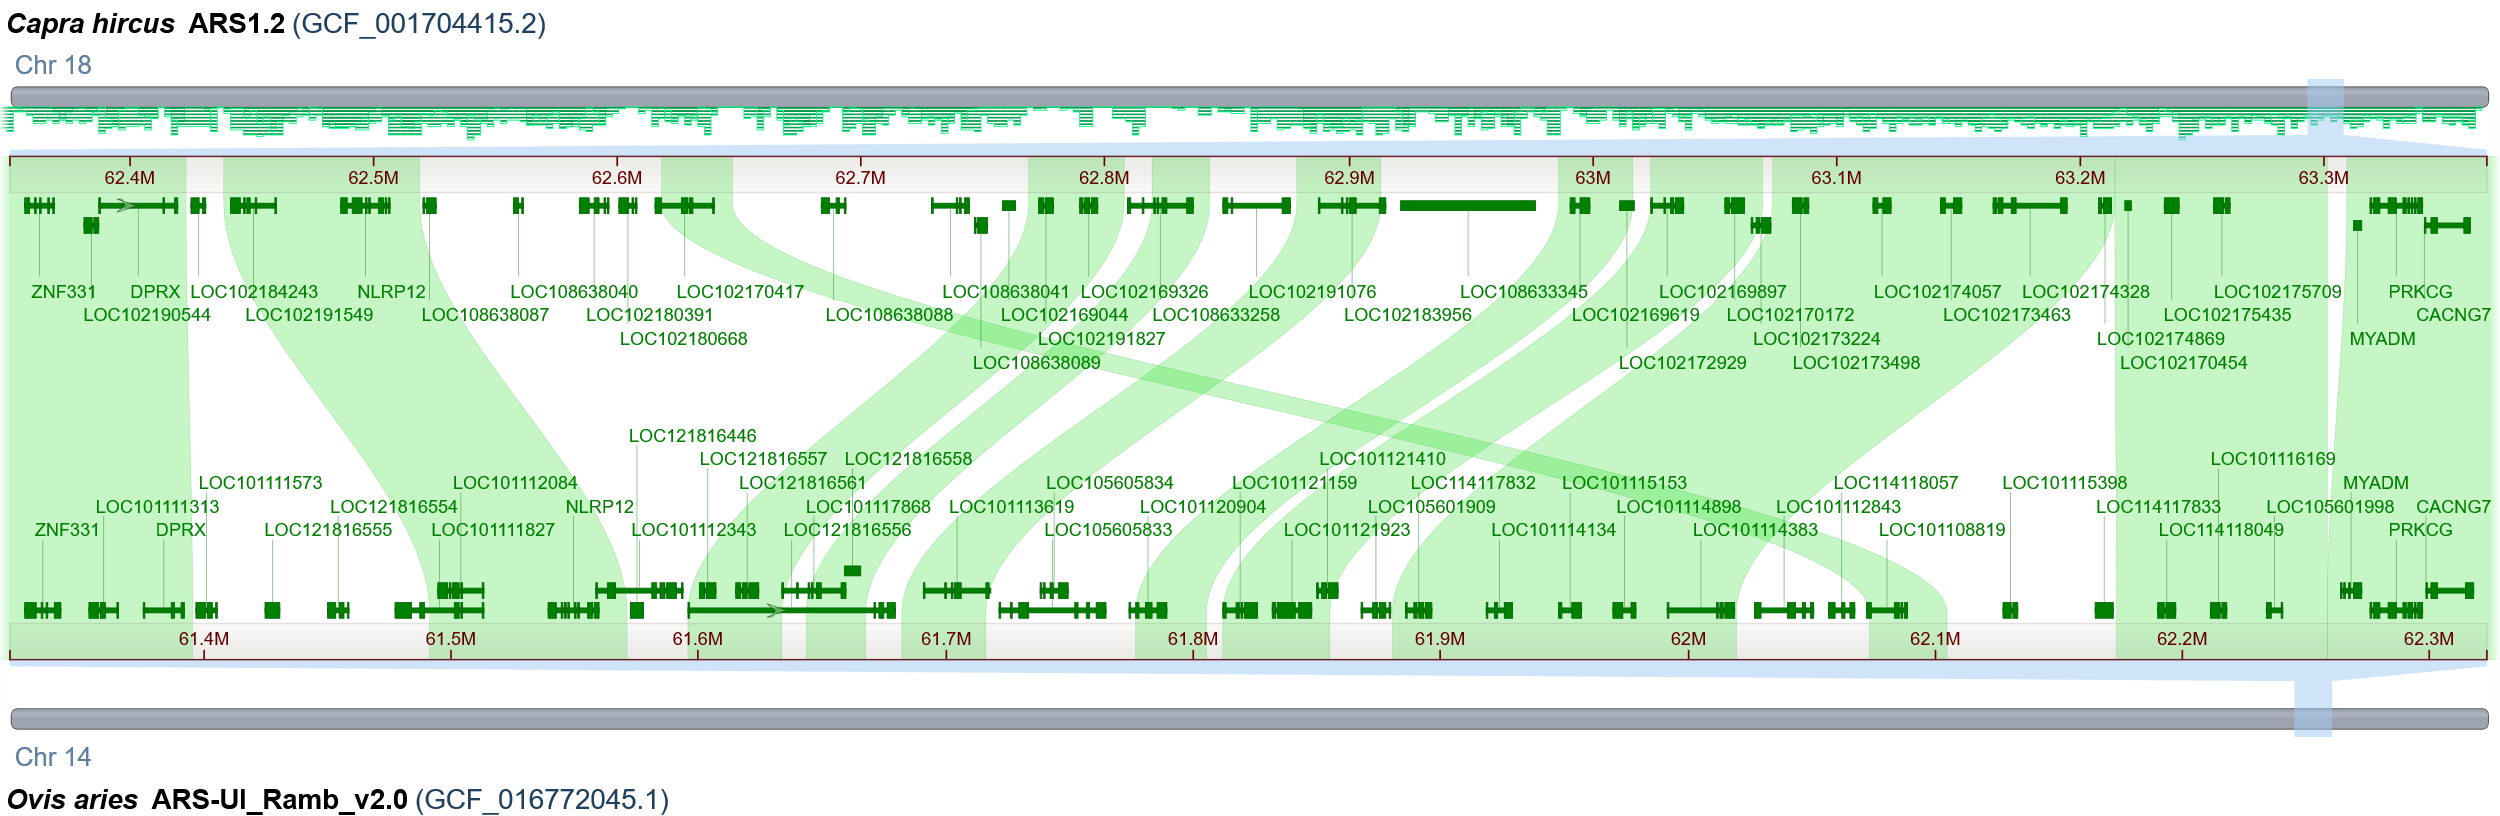
F
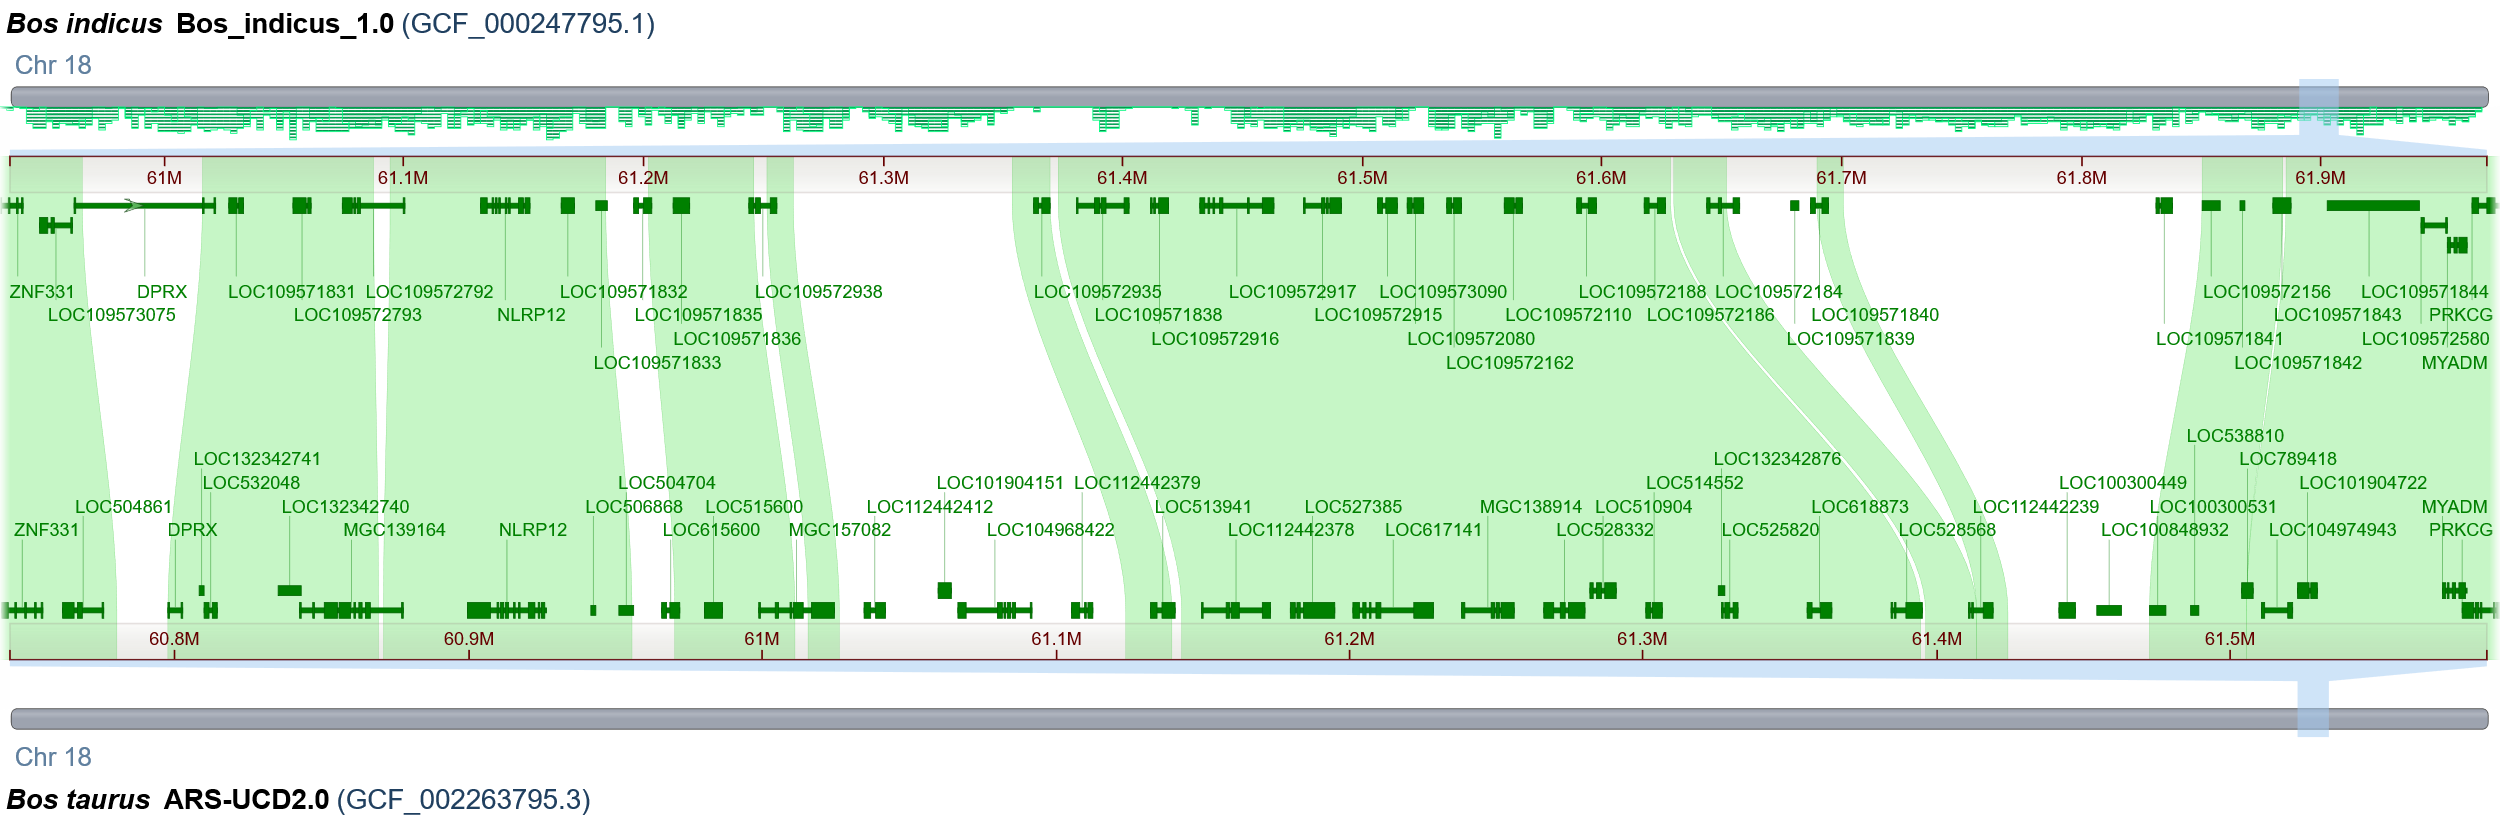


G
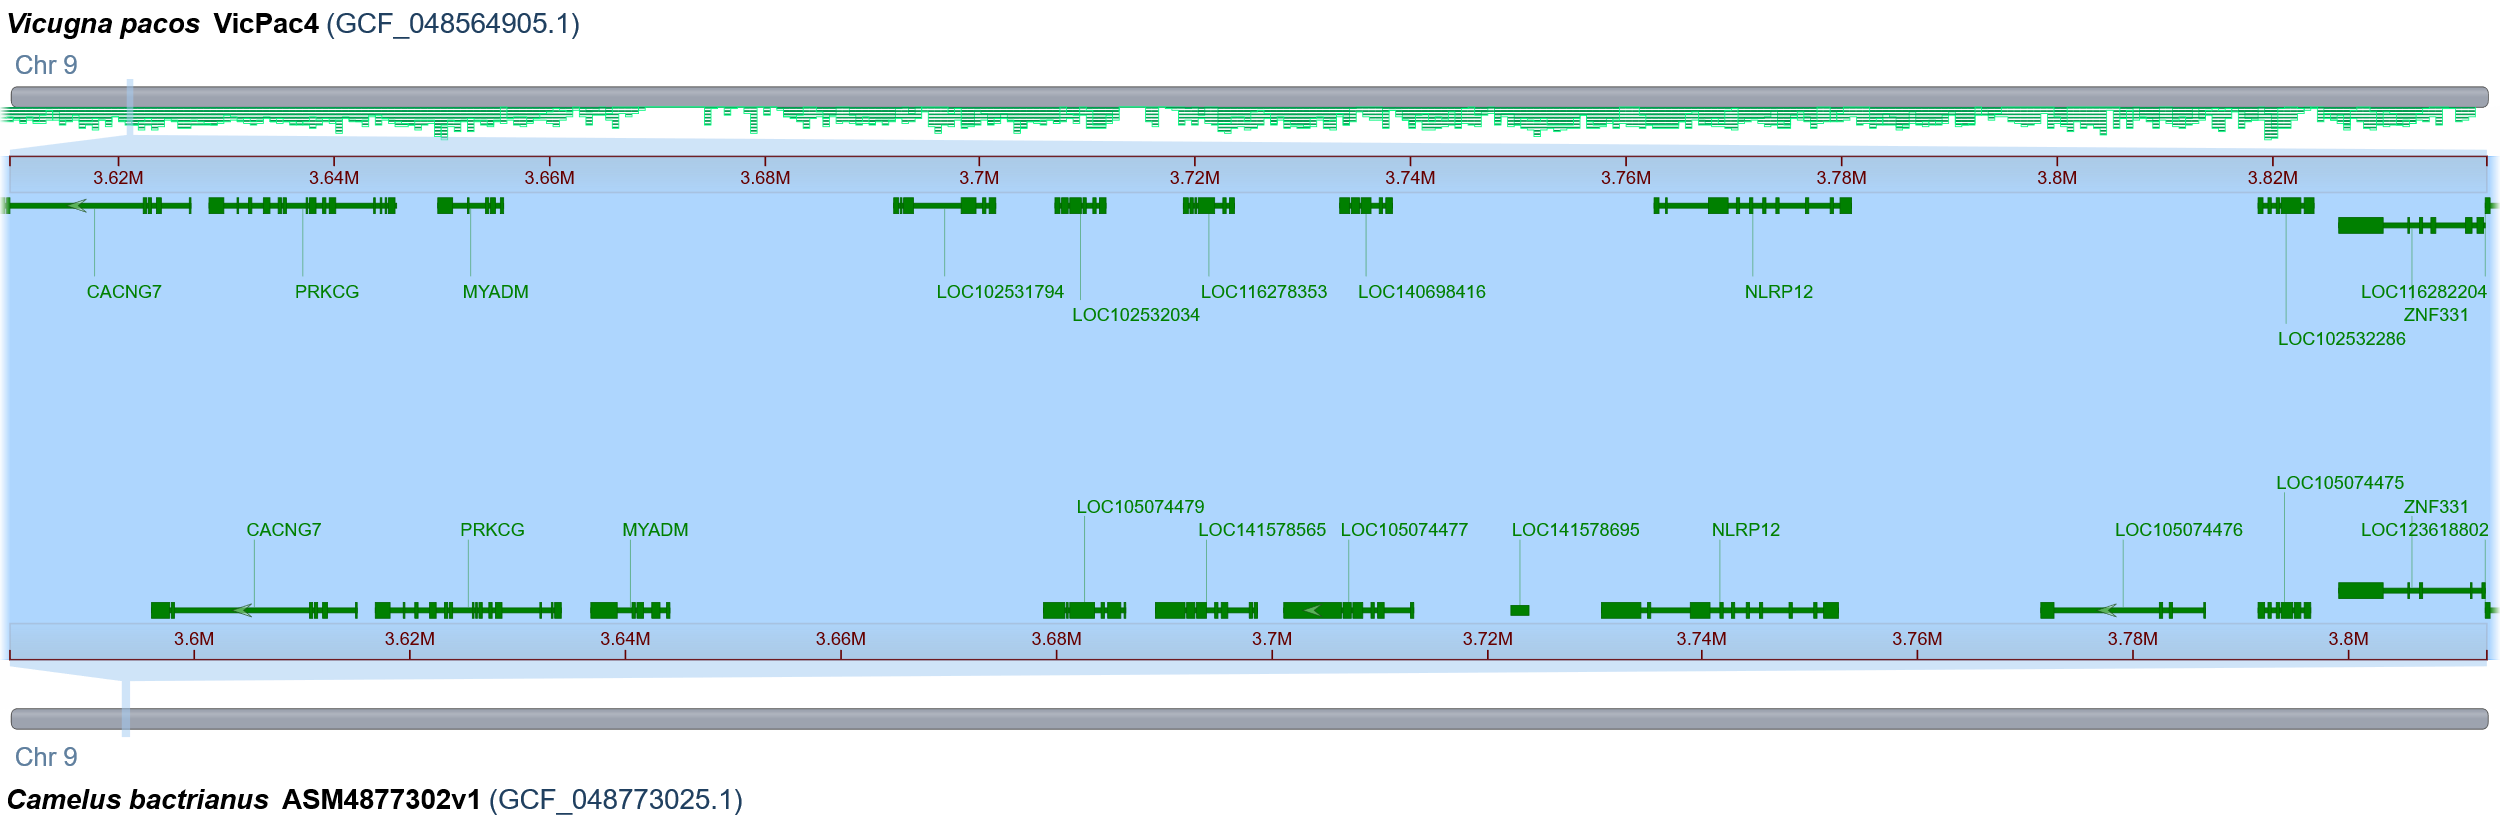


H
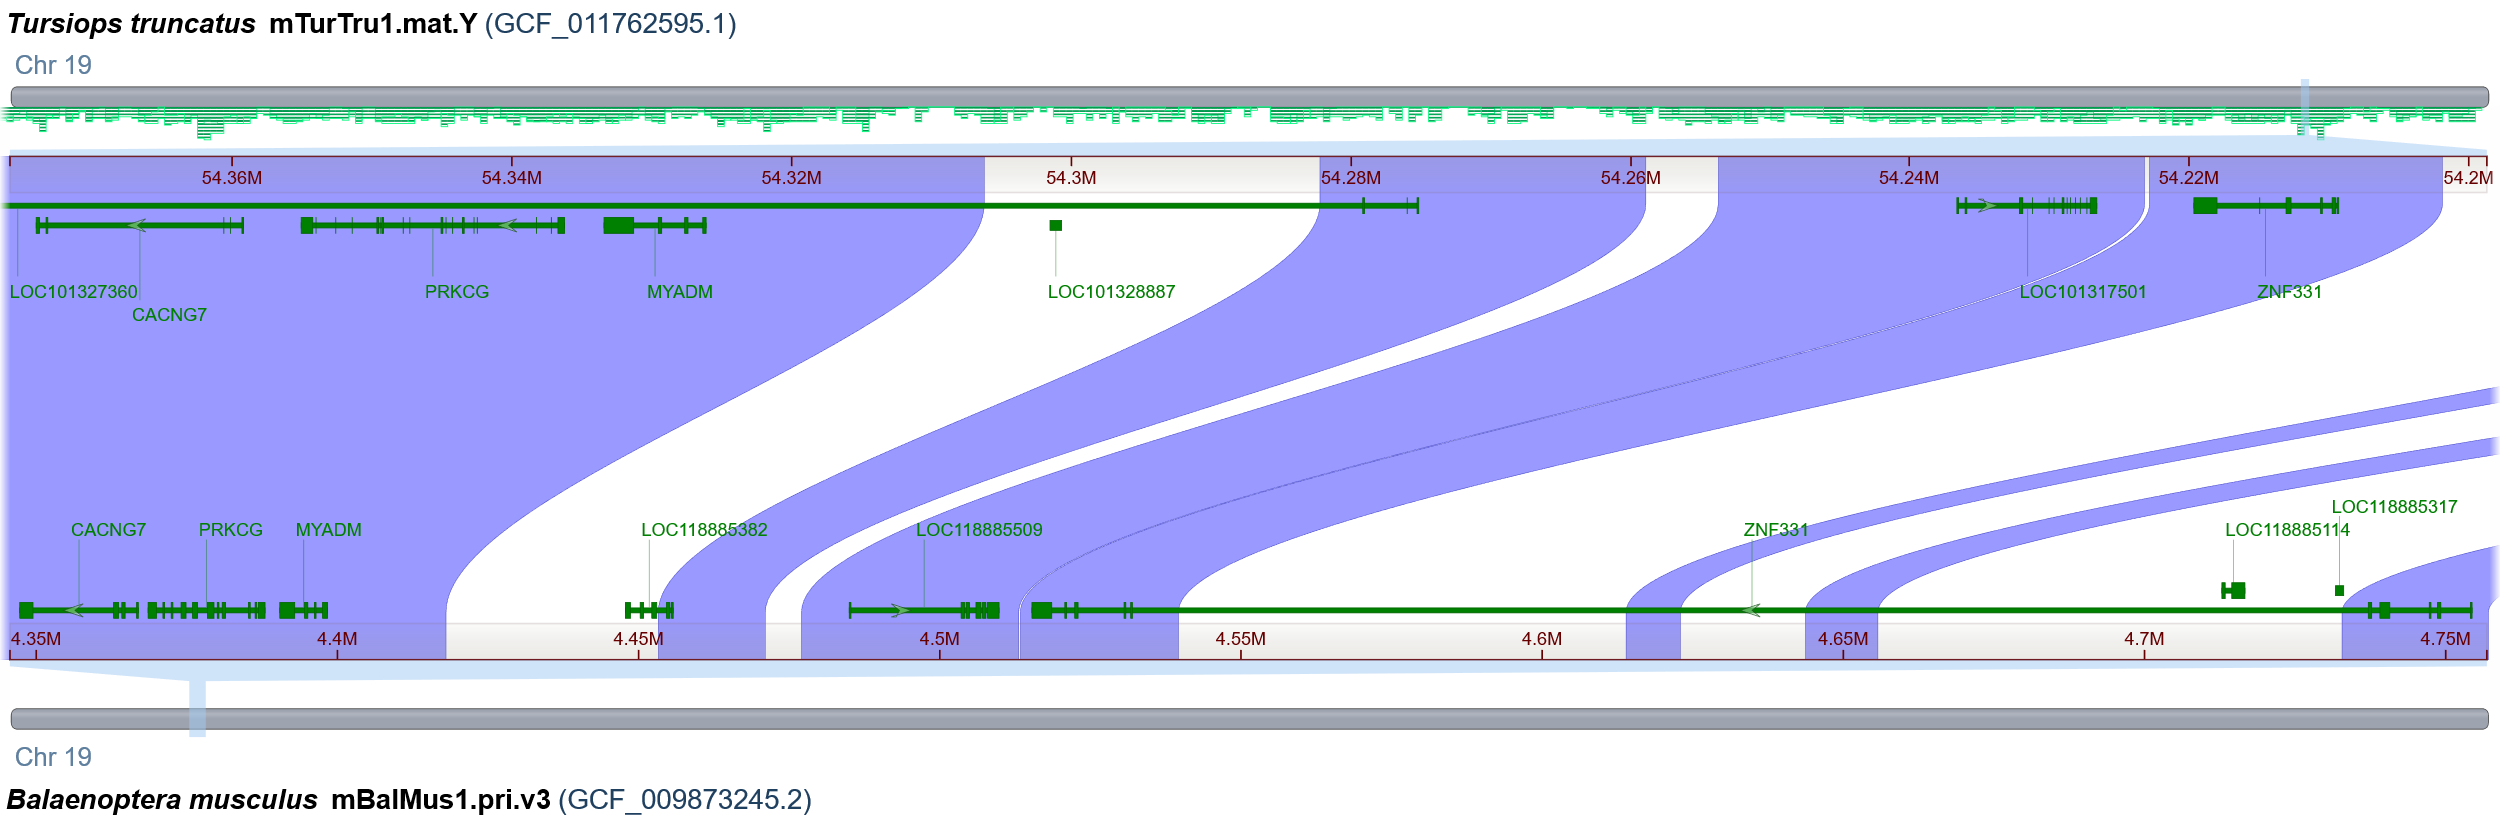


Fig S2 the location *ZDNMPC* based on genome alignment between *Artiodactylas.* A) Bactrian camel and Arabian camel. B) Rambouillet sheep and Texel sheep. C) sheep and cattle. D) cattle and hybrid cattle (*Bos indicus* × *Bos taurus*). E) goat and sheep. F) zebu cattle and cattle. G) Bactrian camel and alpaca. H) common bottlenose dolphin and blue whale.

A


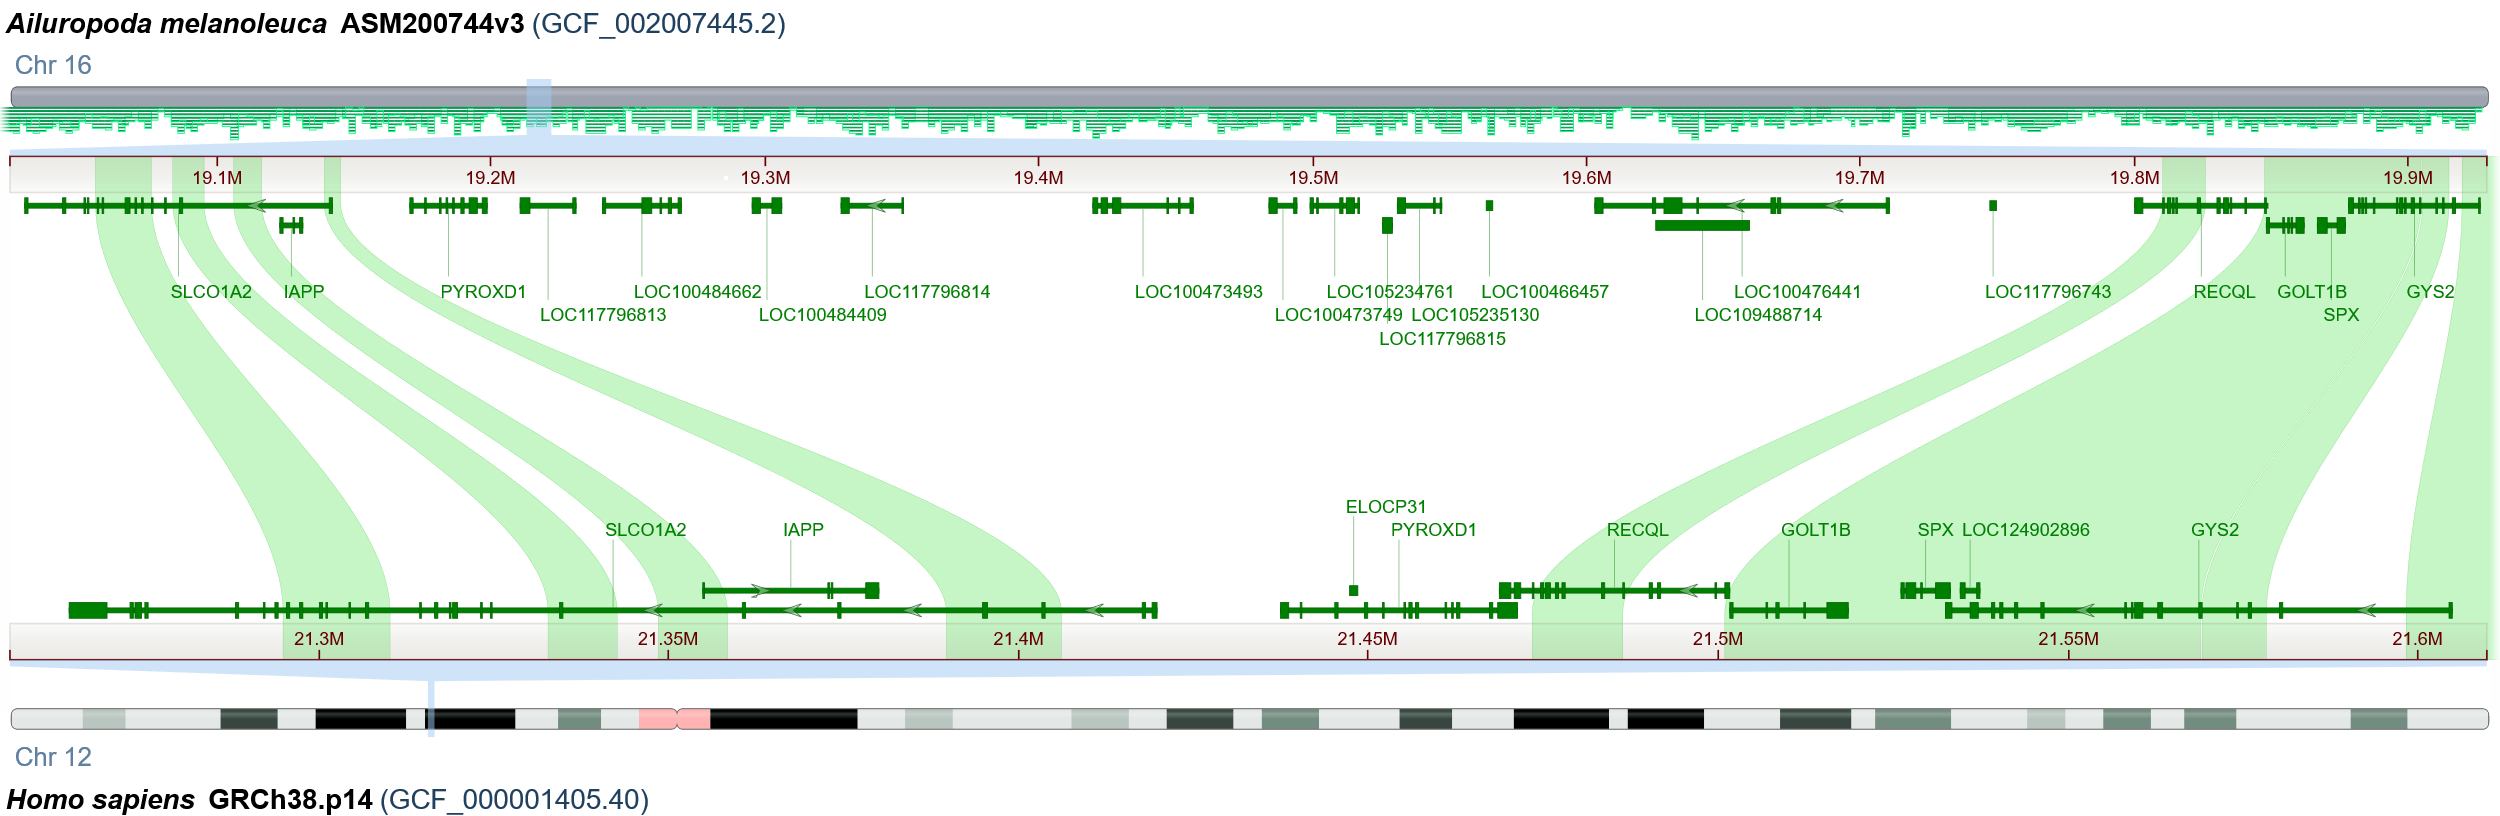
B


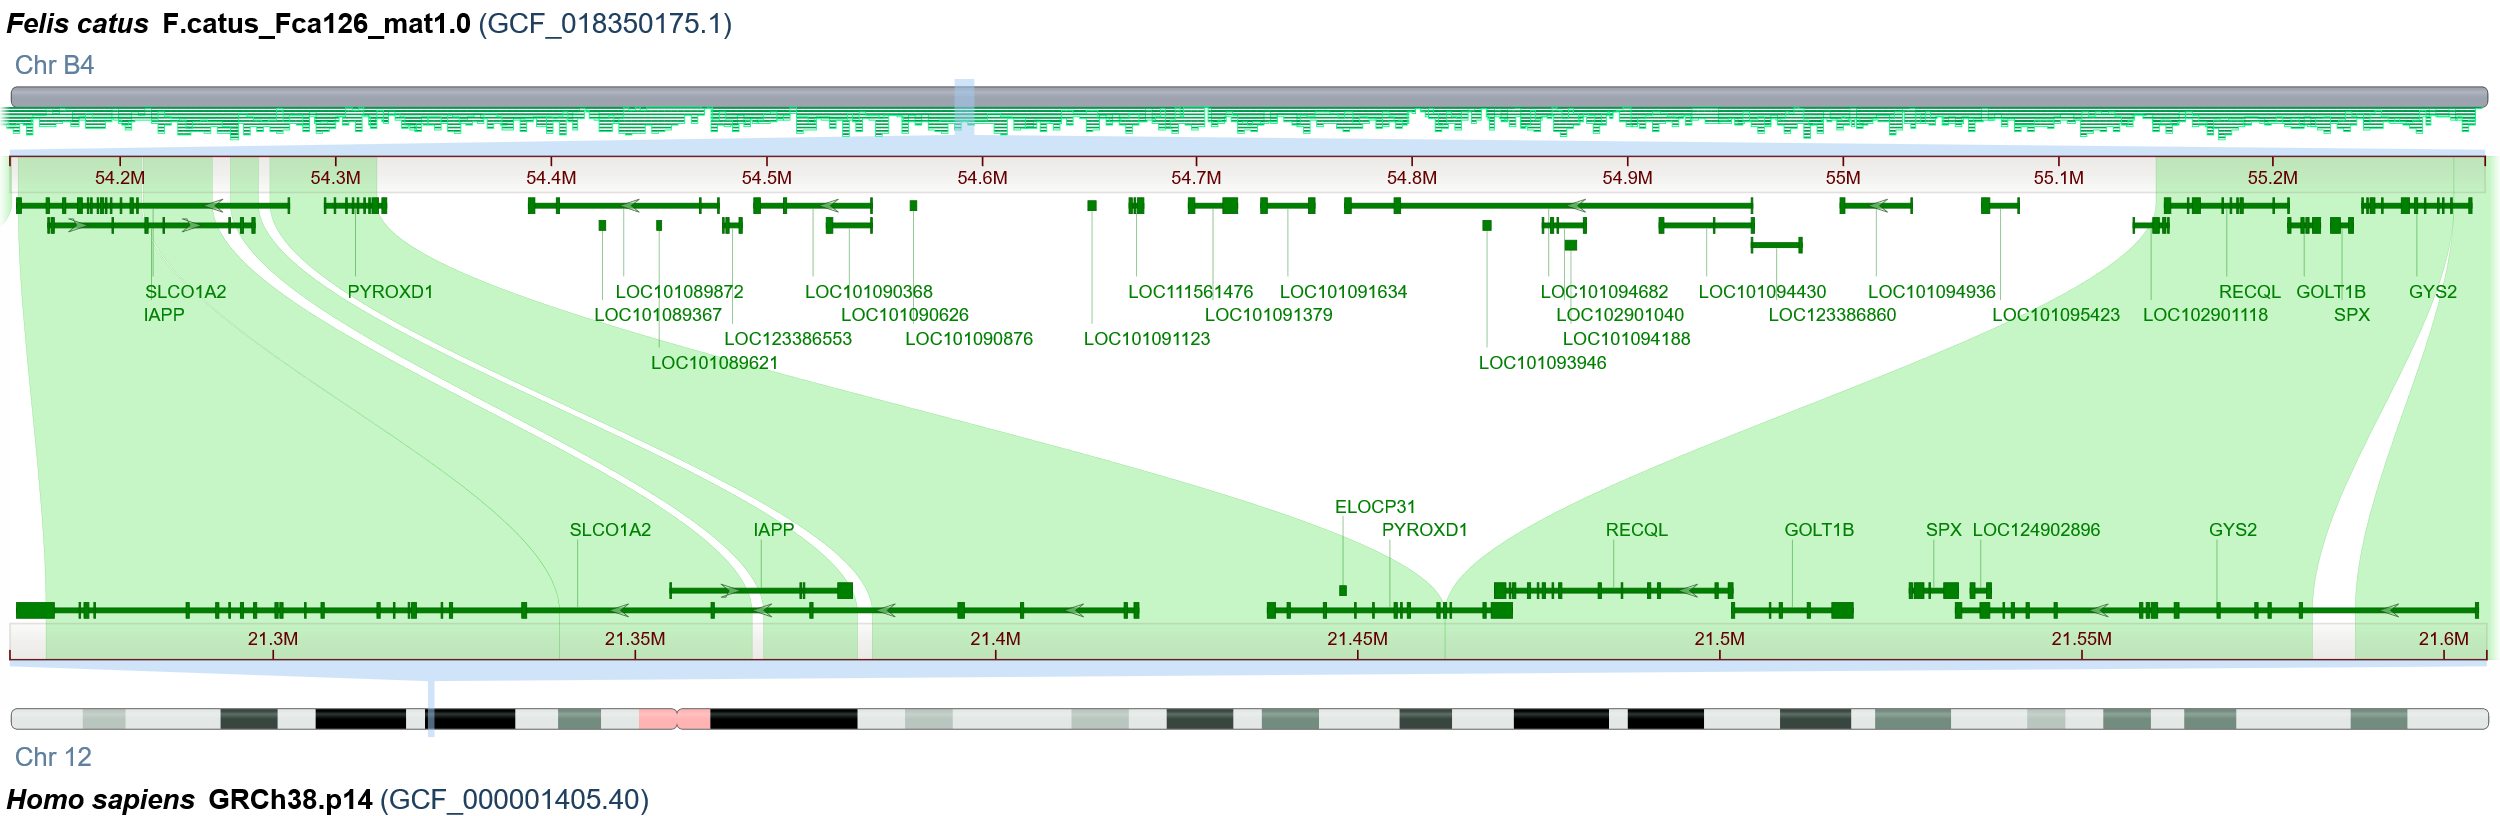
C


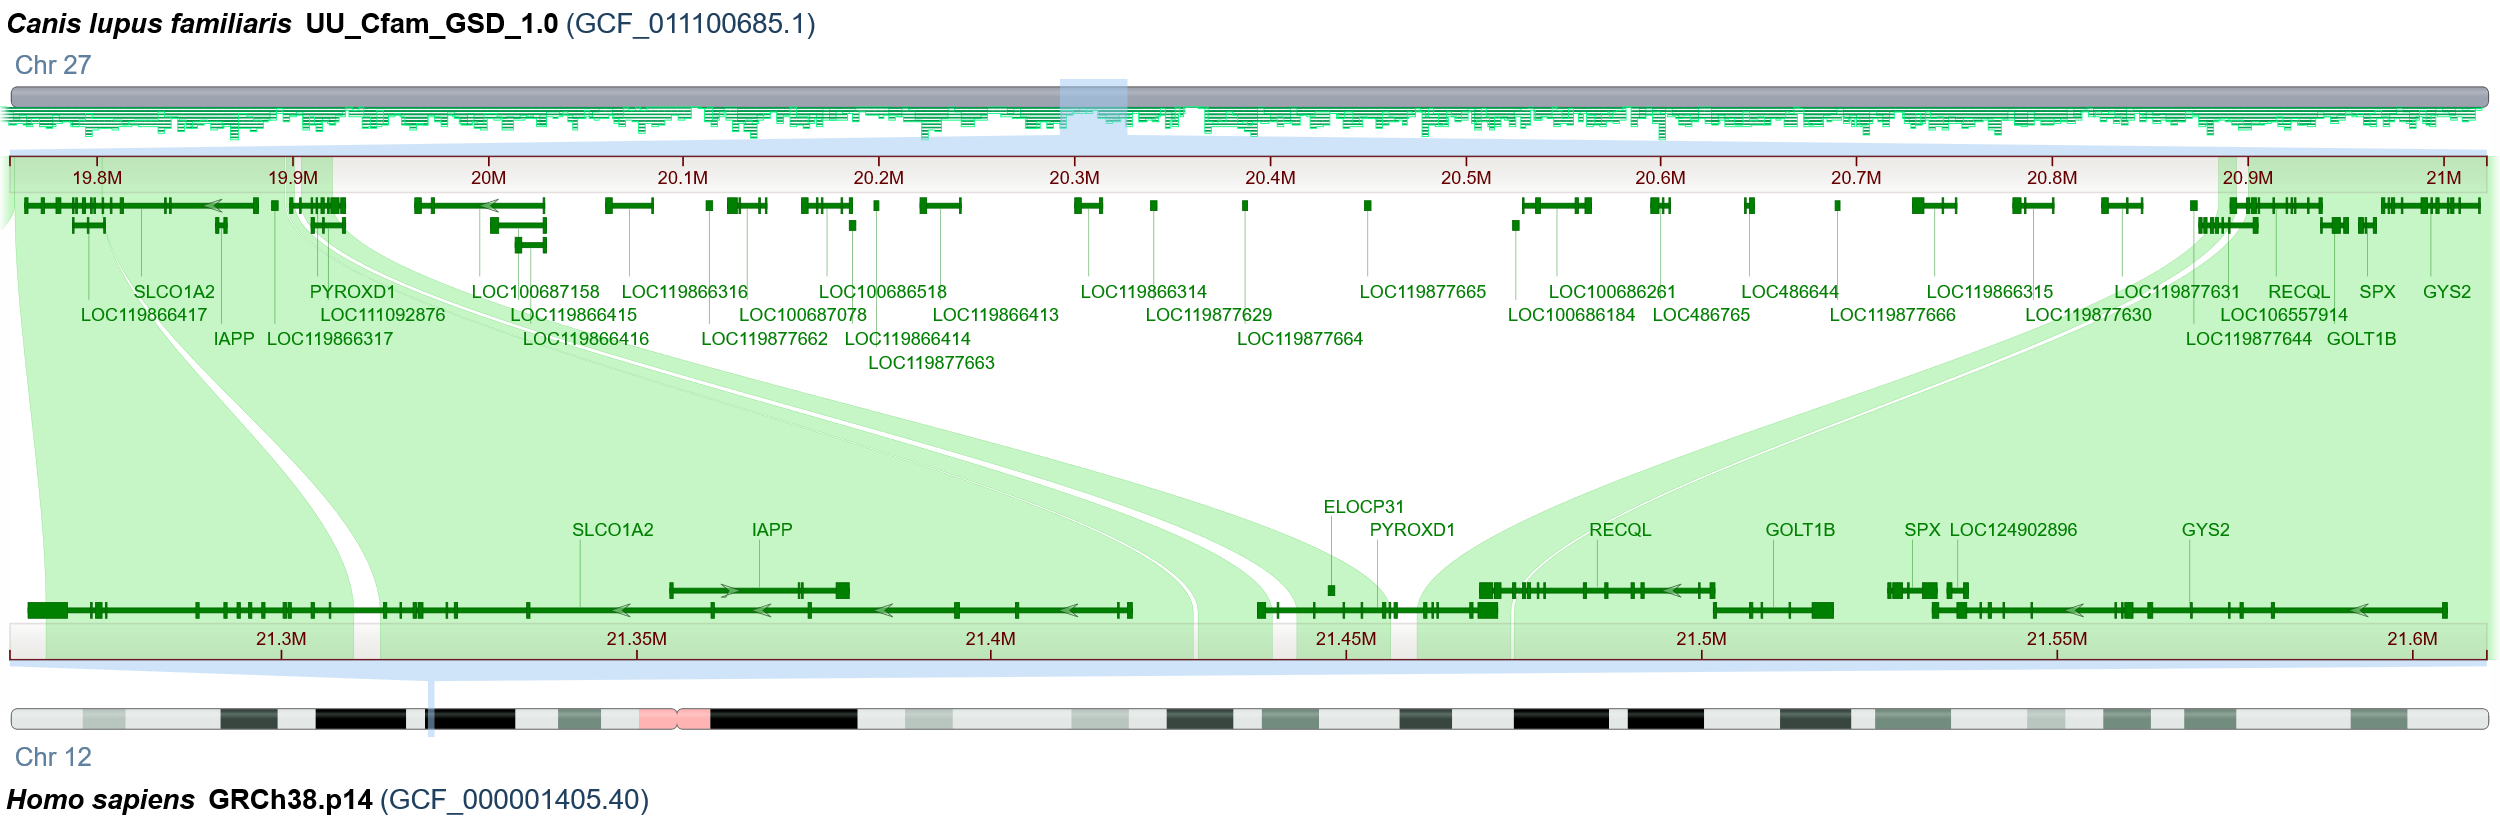


D


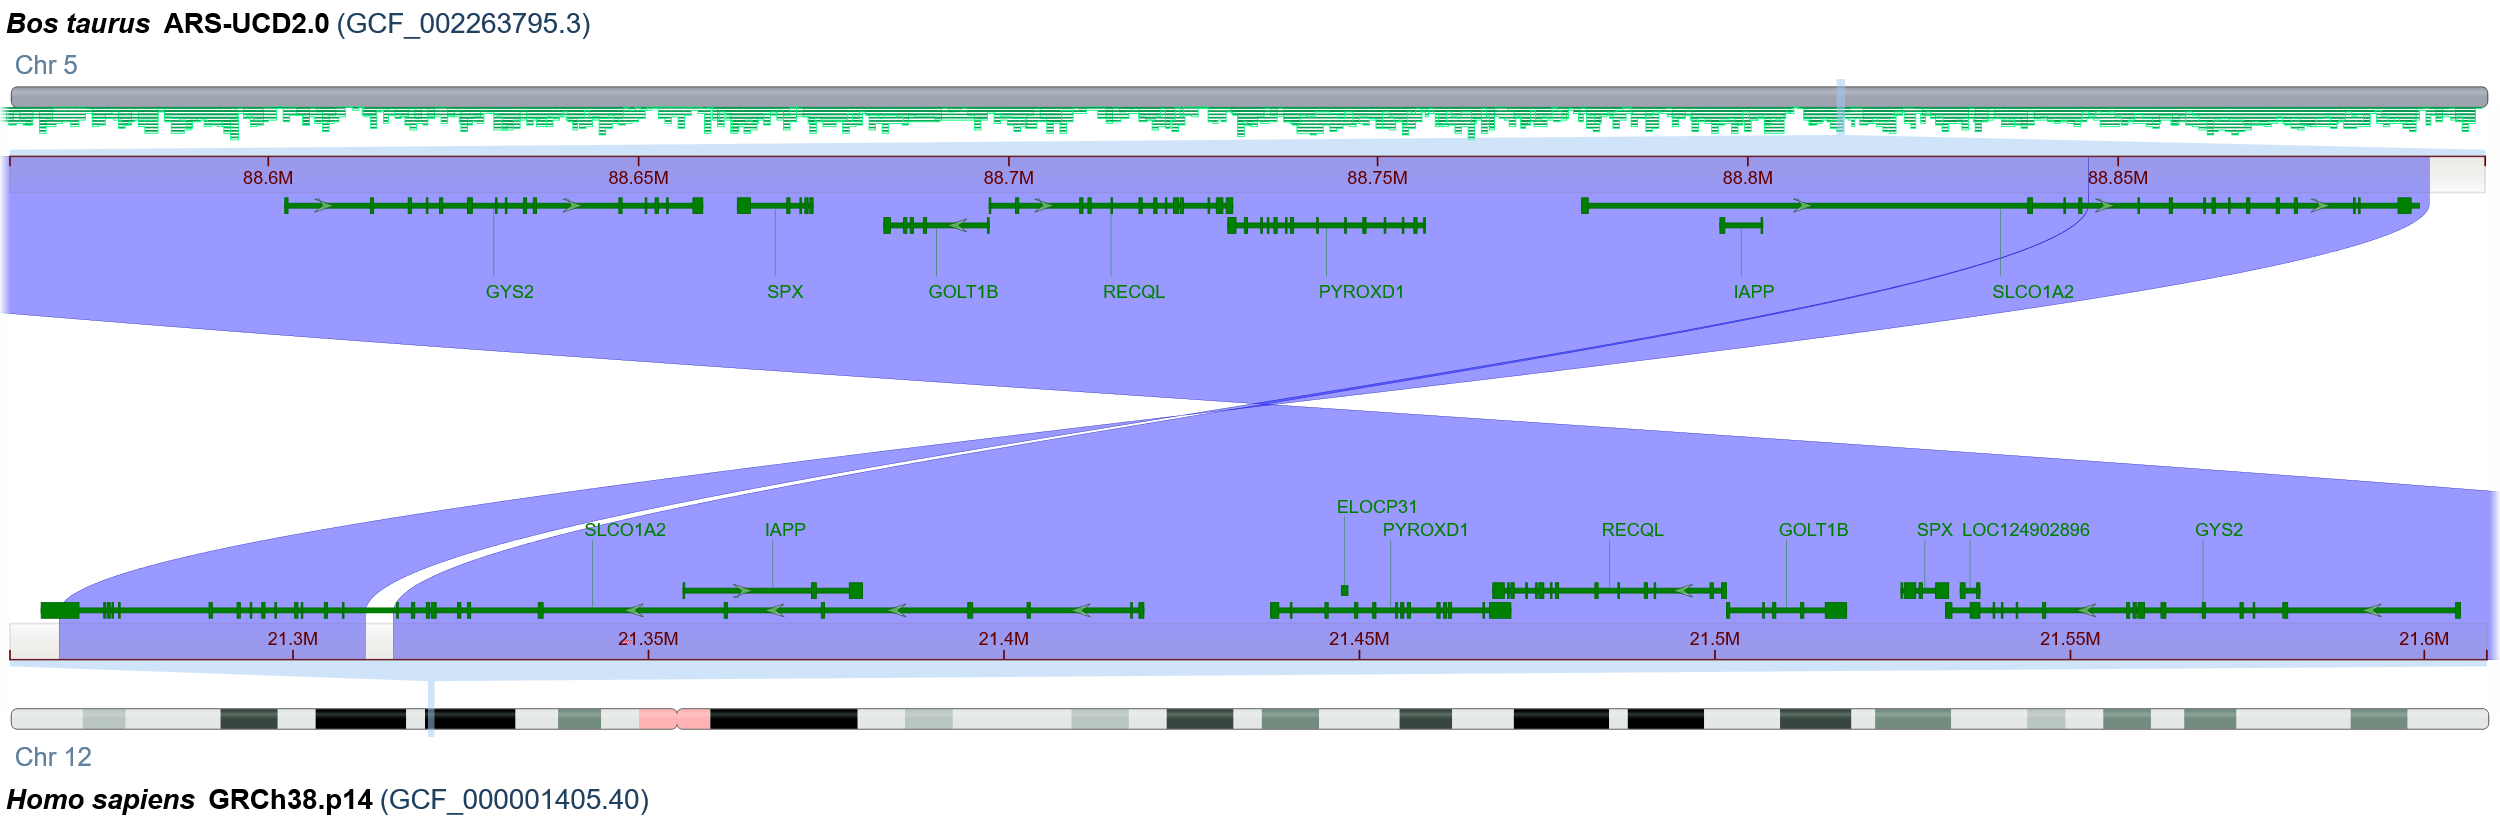


Fig S3 the location *SIPRGSG* based on genome alignment between carnivores and human. A) human and panda. B) human and cat. C) human and dog. D) human and cattle.

A


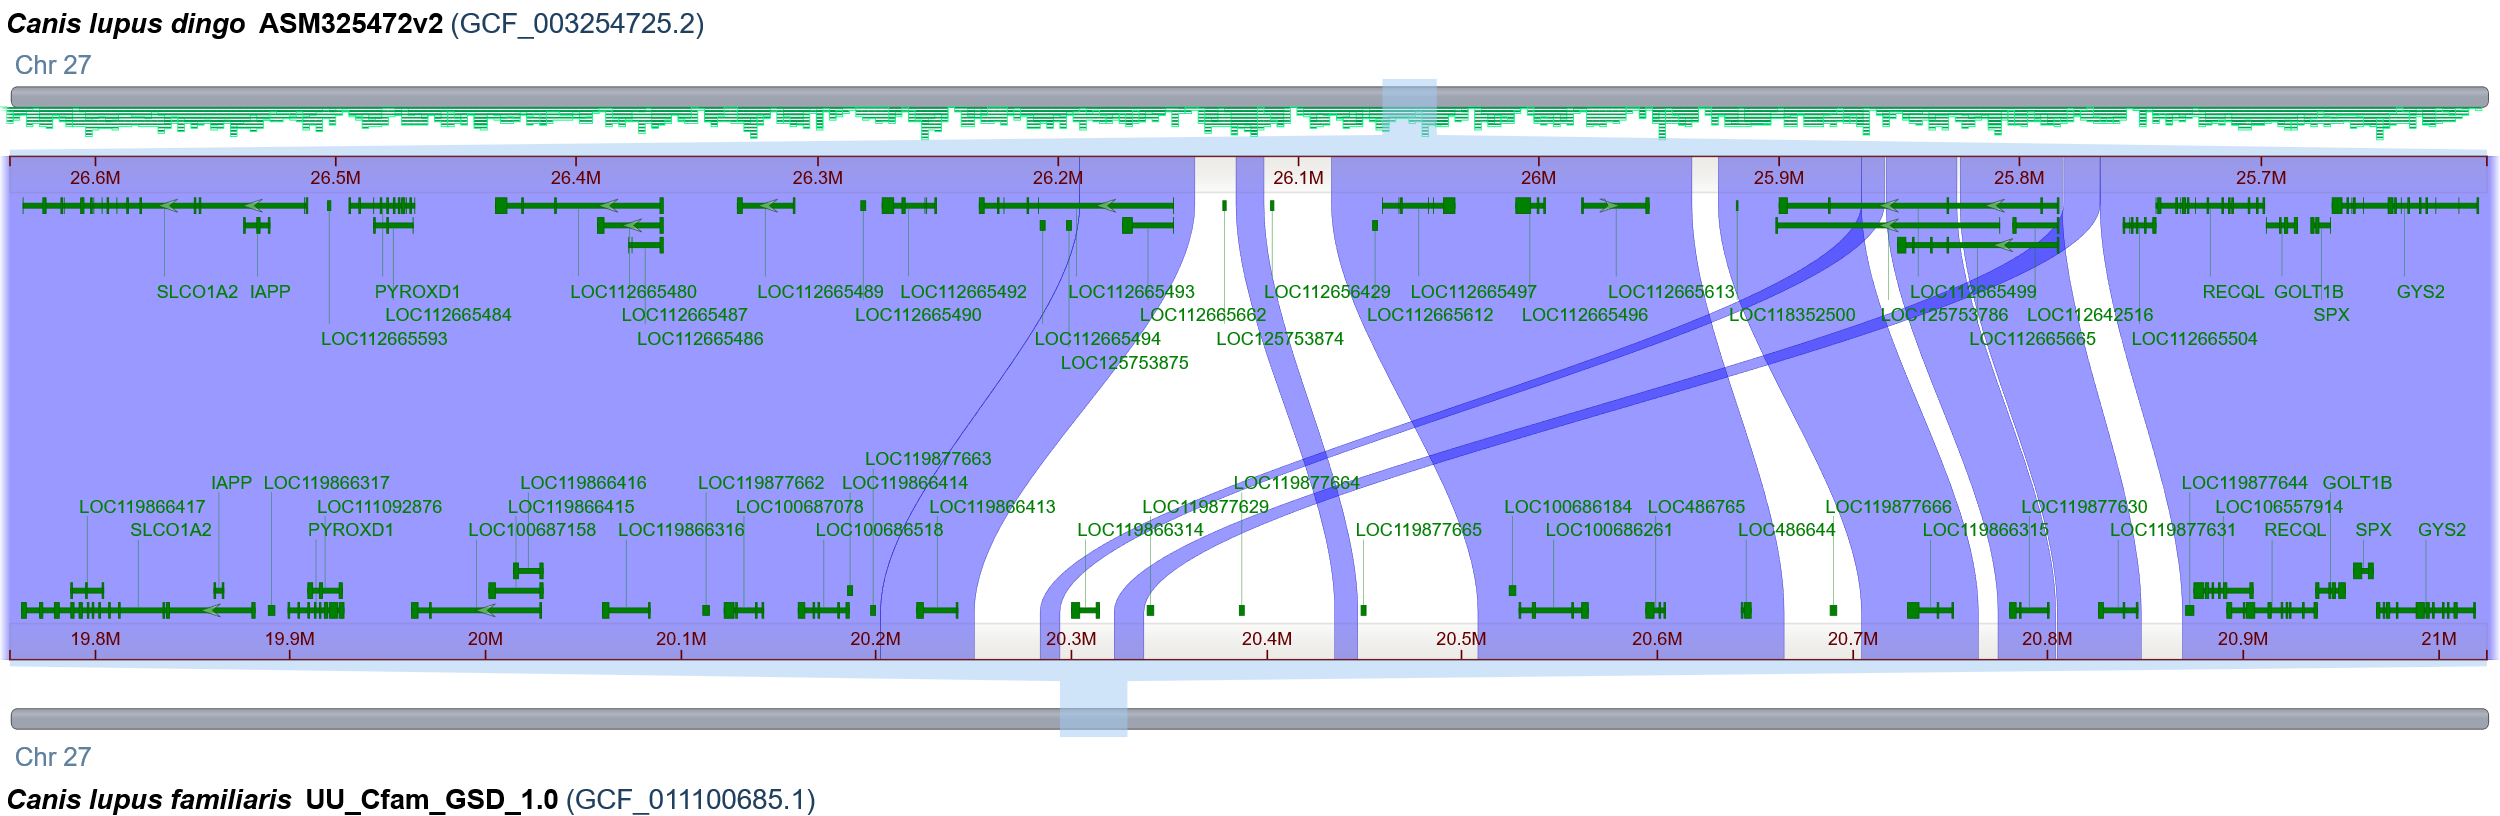


B


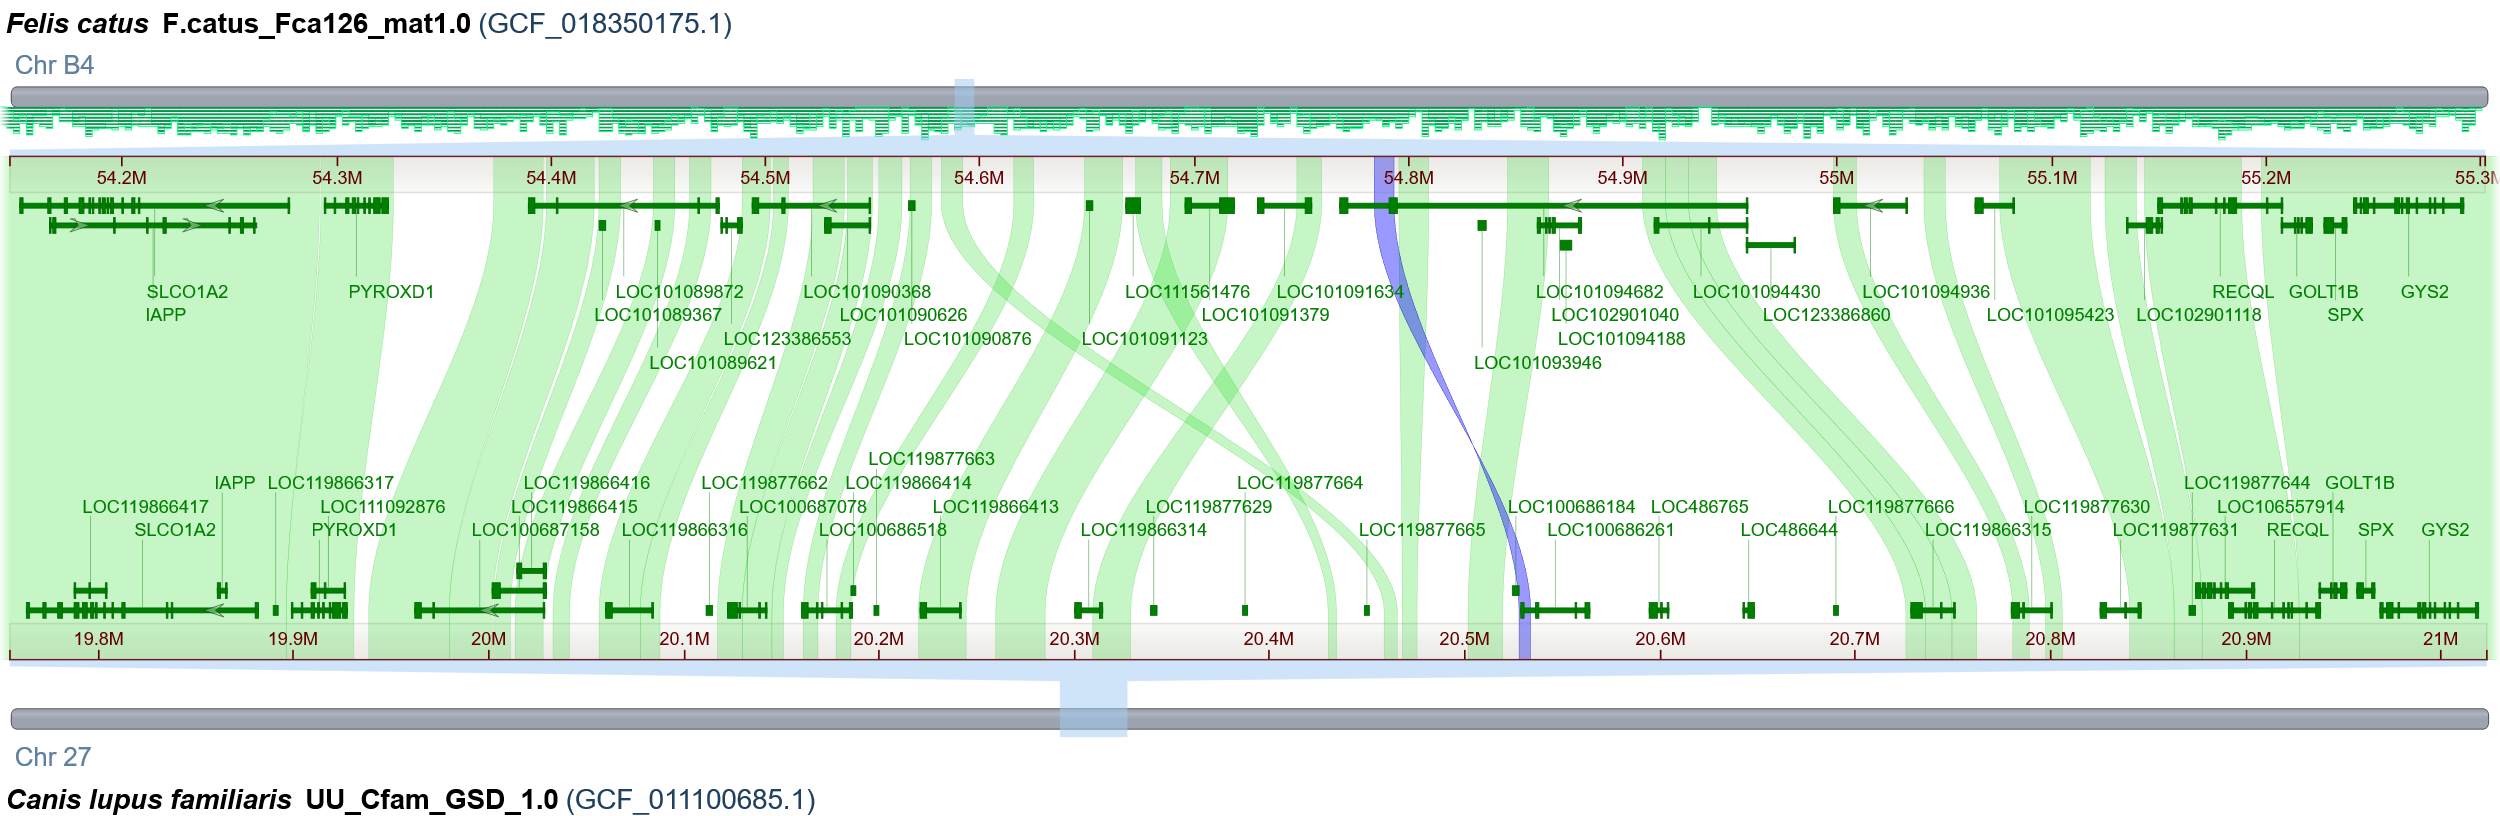


C


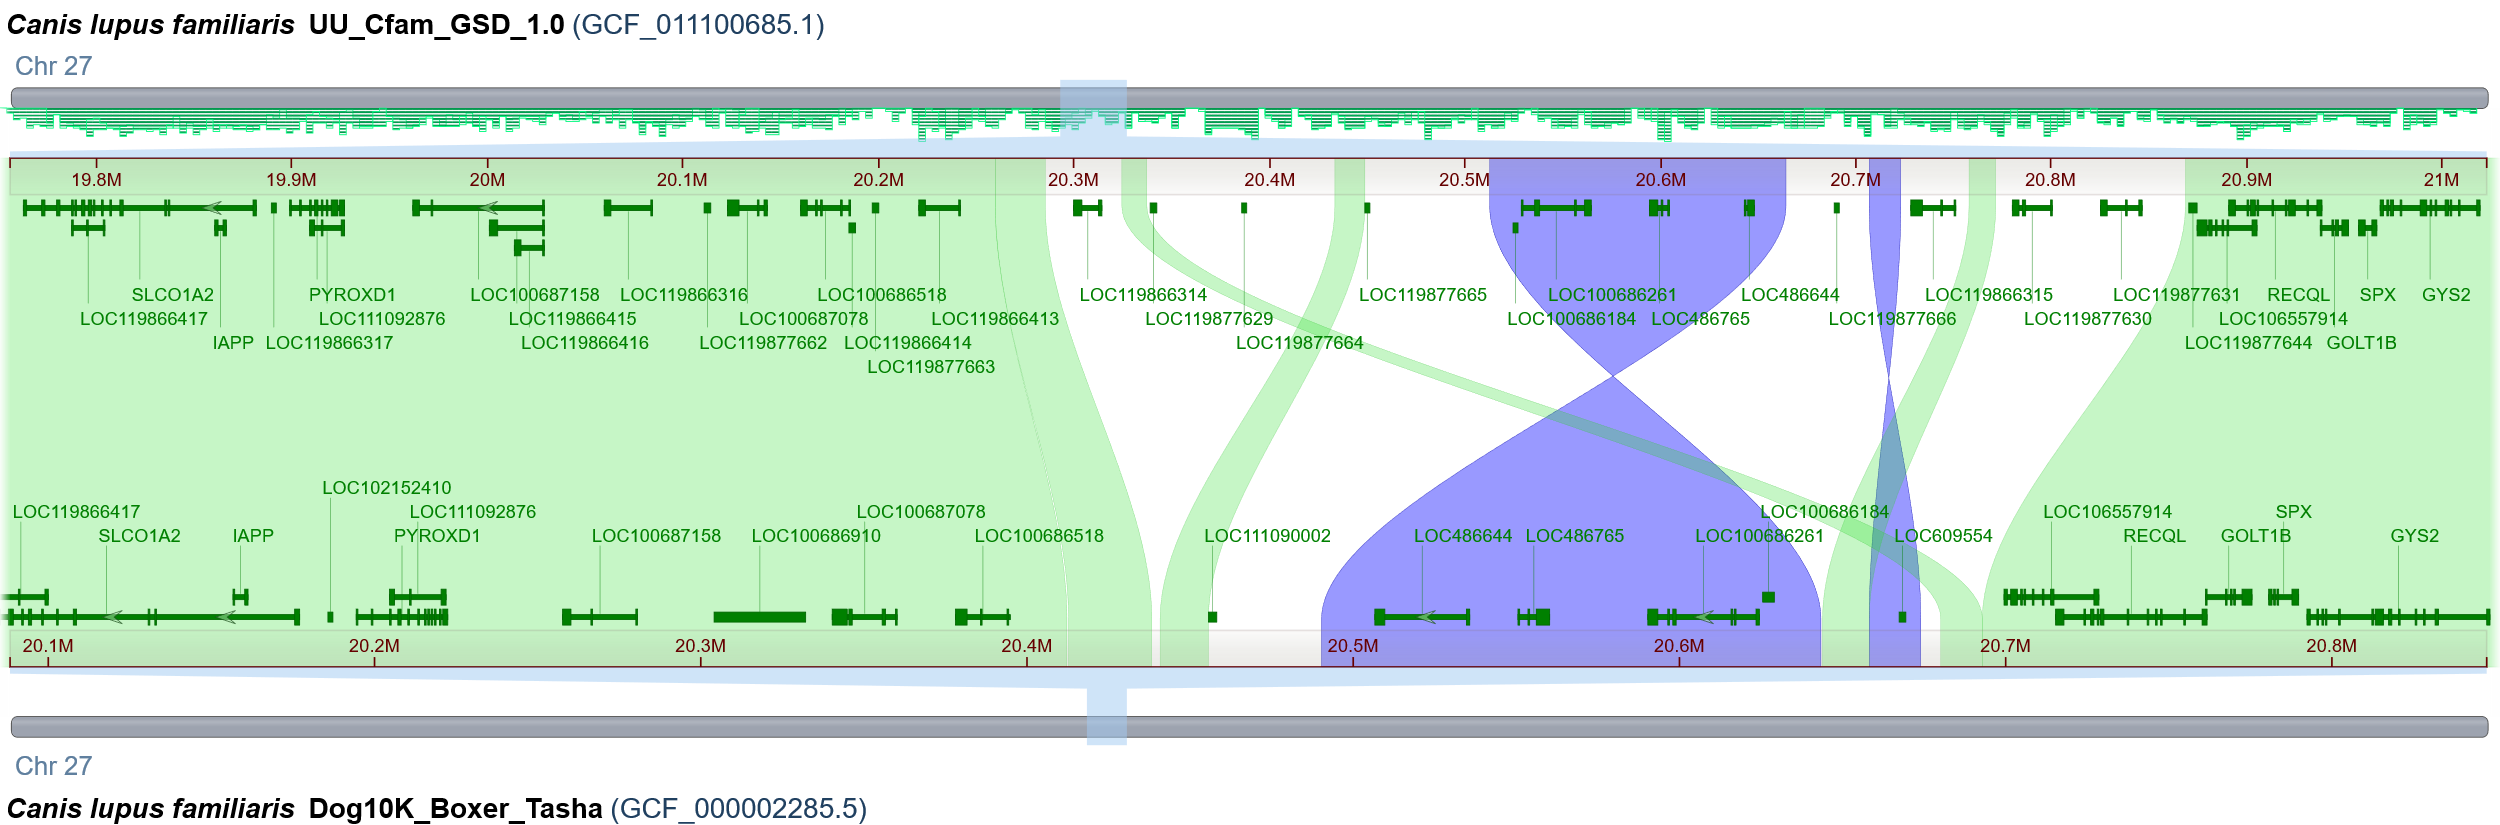


D
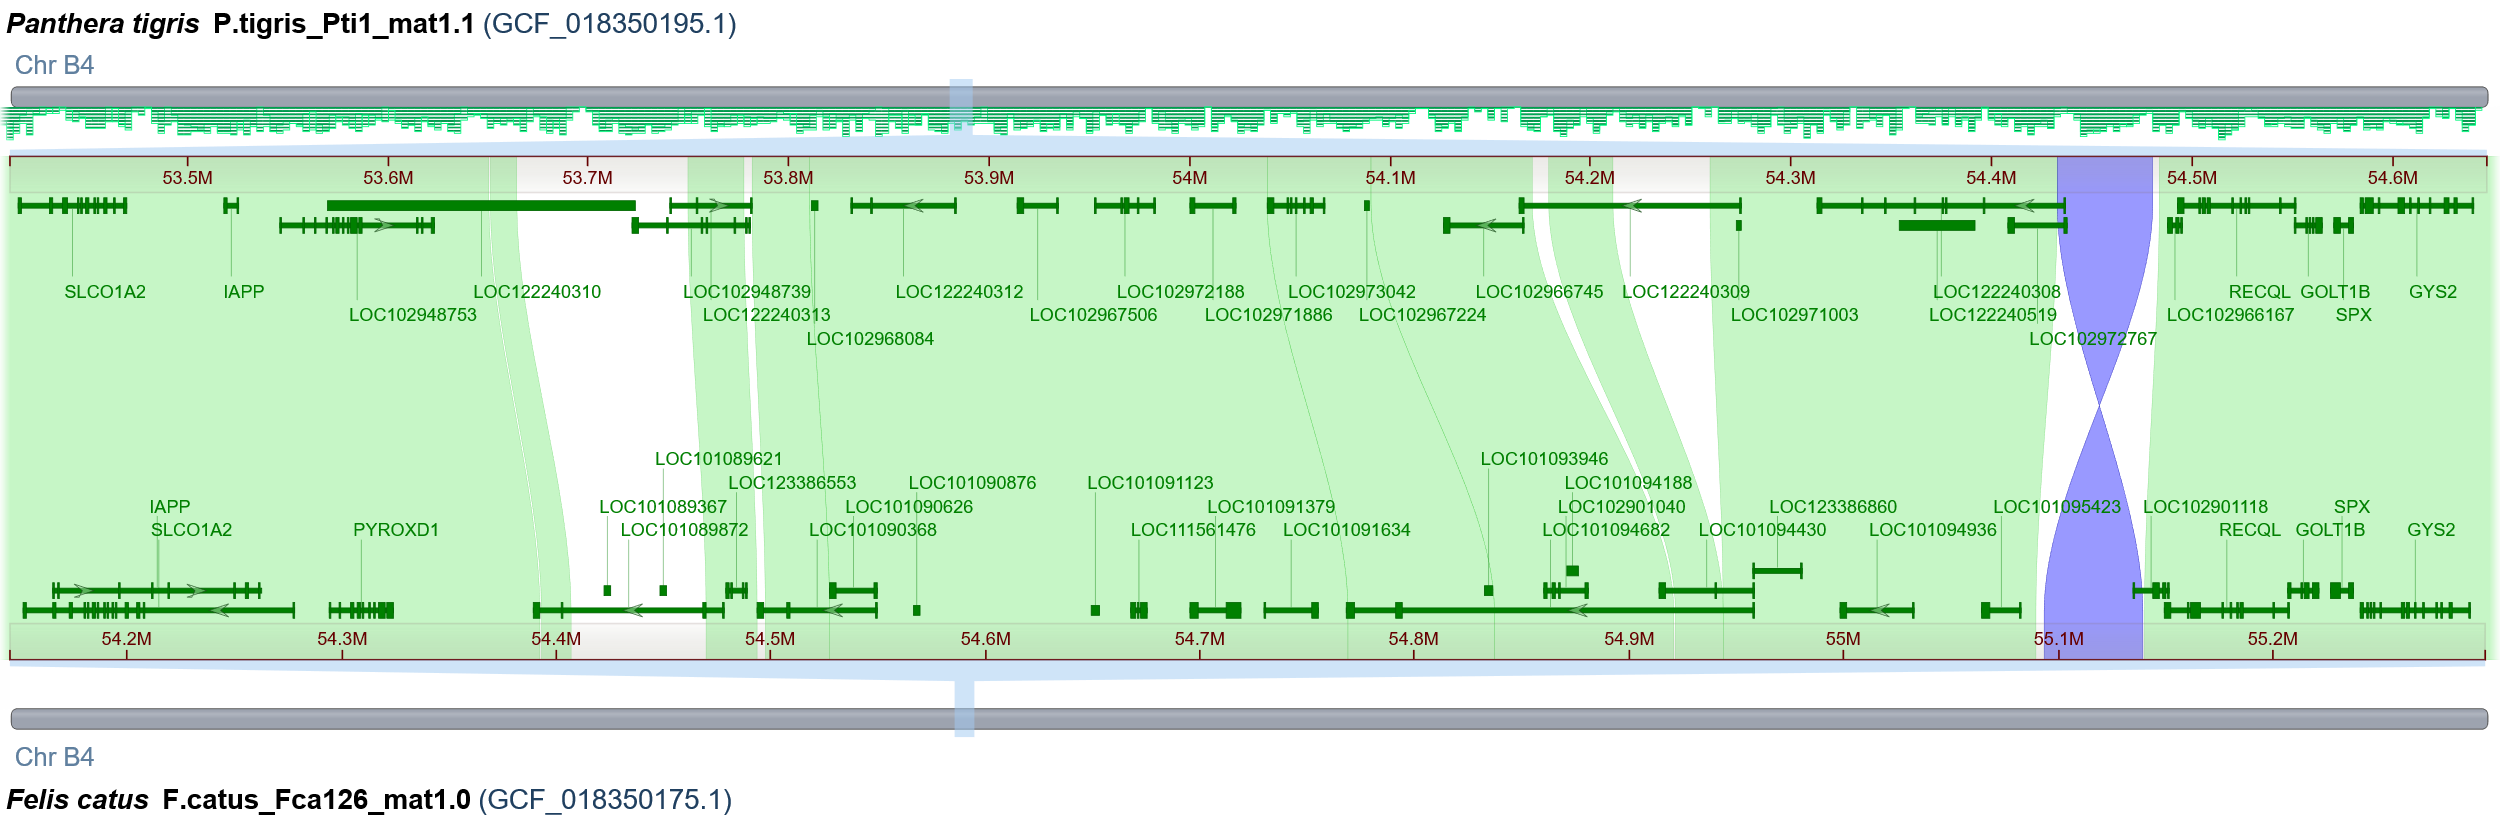


Fig S4 the location *SIPRGSG* based on genome alignment between *Carnivores.* A) dingo and dog. B) cat and dog. C) German Shepherd and boxer of dog breed. D) cat and tiger.
